# Supplementary material
Source: publisher site journal article supplement (https://www.spandidos-publications.com/5280/downloadSupplementary)
Supplement: Supplementary file 1 [file downloadSupplementary]

## Sheet: GSE55092-DERs
Table SIA. Identification of 1,183 differentially expressed RNAs in GSE55092.
ID	Symbol	Type	FDR	P-value	logFC
230577_at	LINC00844	lncRNA	0.00143	0.000434	-1.456
227554_at	MAGI2-AS3	lncRNA	7.44e-09	8.45e-10	-1.452
244740_at	ZNF667-AS1	lncRNA	3.94e-17	1.25e-18	-1.416
1559315_s_at	SOCS2-AS1	lncRNA	1.35e-12	8.57e-14	-1.389
1558881_at	LINC00924	lncRNA	9.33e-09	1.08e-09	-1.279
227919_at	UCA1	lncRNA	1.51e-09	1.53e-10	-1.182
228004_at	LINC00261	lncRNA	4.36e-09	4.76e-10	-1.18
227446_s_at	DHRS4-AS1	lncRNA	1.97e-07	2.85e-08	-1.112
1559826_a_at	LINC00960	lncRNA	2.57e-06	4.53e-07	-1.108
236632_at	HHIP-AS1	lncRNA	4.03e-18	1.11e-19	-1.106
226587_at	PWAR6	lncRNA	0.00981	0.0037	-1.106
229156_s_at	PRKAG2-AS1	lncRNA	8.87e-09	1.02e-09	-1.043
1556364_at	ADAMTS9-AS2	lncRNA	0.000162	4.01e-05	-1.04
231260_at	ZNF582-AS1	lncRNA	4.56e-08	5.92e-09	-1.016
230245_s_at	LINC00926	lncRNA	6.59e-07	1.04e-07	-1.011
1553987_at	MAPKAPK5-AS1	lncRNA	3.47e-16	1.29e-17	1.008
1558801_at	NNT-AS1	lncRNA	1.16e-06	1.93e-07	1.008
225515_s_at	WAC-AS1	lncRNA	2.95e-14	1.44e-15	1.01
1569332_at	LINC00488	lncRNA	1.29e-13	6.94e-15	1.029
235174_s_at	LINC01003	lncRNA	1.38e-06	2.32e-07	1.037
1562640_at	HOXA-AS2	lncRNA	9.81e-14	5.15e-15	1.038
226149_at	SNHG11	lncRNA	2.79e-10	2.53e-11	1.048
232790_at	RNASEH1-AS1	lncRNA	9.33e-08	1.28e-08	1.05
1558906_a_at	OSER1-AS1	lncRNA	1.8e-08	2.18e-09	1.054
224870_at	DANCR	lncRNA	0.000256	6.57e-05	1.056
230121_at	SERTAD4-AS1	lncRNA	7.27e-08	9.76e-09	1.058
235010_at	ZBED5-AS1	lncRNA	1.14e-07	1.59e-08	1.084
232899_at	FAM41C	lncRNA	4.09e-18	1.13e-19	1.087
228612_at	RAB30-AS1	lncRNA	2.5e-14	1.21e-15	1.092
237028_at	ENO1-AS1	lncRNA	1.65e-11	1.23e-12	1.093
237313_at	C1QTNF1-AS1	lncRNA	8.04e-05	1.86e-05	1.106
229227_at	DICER1-AS1	lncRNA	6.13e-12	4.27e-13	1.11
235587_at	PAXIP1-AS1	lncRNA	8.49e-07	1.37e-07	1.115
242888_at	PRRT3-AS1	lncRNA	1.34e-10	1.16e-11	1.132
232953_at	LINC00266-1	lncRNA	1.54e-10	1.34e-11	1.139
227745_at	RNF139-AS1	lncRNA	8.56e-16	3.37e-17	1.14
216209_at	LINC00939	lncRNA	0.000436	0.000118	1.157
235829_at	CAHM	lncRNA	1.87e-12	1.21e-13	1.16
230780_at	LINC00886	lncRNA	4.71e-09	5.17e-10	1.167
208674_x_at	PINK1-AS	lncRNA	1.06e-20	1.99e-22	1.173
1568983_a_at	GABPB1-AS1	lncRNA	6.54e-05	1.49e-05	1.198
1555822_at	FAM138A	lncRNA	8.94e-06	1.72e-06	1.21
1560081_at	RAD51-AS1	lncRNA	1.63e-10	1.42e-11	1.211
233871_at	SNAP25-AS1	lncRNA	1.68e-10	1.47e-11	1.234
220399_at	LINC00115	lncRNA	1.45e-11	1.08e-12	1.289
224443_at	LINC00467	lncRNA	7.04e-12	4.95e-13	1.294
1556072_at	LINC00528	lncRNA	2.16e-17	6.61e-19	1.295
226995_at	LINC00205	lncRNA	1.28e-13	6.84e-15	1.3
241224_x_at	DSCR8	lncRNA	4.61e-05	1.02e-05	1.3
1558290_a_at	PVT1	lncRNA	1.47e-12	9.37e-14	1.306
1556436_at	EXTL3-AS1	lncRNA	9.55e-13	5.91e-14	1.308
1552862_at	RUSC1-AS1	lncRNA	1.35e-11	9.97e-13	1.374
233530_at	SDCBP2-AS1	lncRNA	1.69e-12	1.09e-13	1.385
1558404_at	LINC00622	lncRNA	3.28e-11	2.57e-12	1.411
240574_at	DNAJC3-AS1	lncRNA	1.16e-20	2.19e-22	1.454
239764_at	ITPR1-AS1	lncRNA	6.38e-12	4.46e-13	1.465
238432_at	DLGAP1-AS1	lncRNA	1.06e-19	2.28e-21	1.482
1559573_at	LINC01093	lncRNA	3.29e-51	1.2e-55	-4.6
224646_x_at	H19	lncRNA	2.95e-08	3.71e-09	-2.12
232090_at	DNM3OS	lncRNA	8.03e-22	1.26e-23	-1.75
1559363_at	LINC01146	lncRNA	2.13e-17	6.5e-19	-1.59
1559033_at	LINC01018	lncRNA	2.35e-15	9.81e-17	-1.58
219791_s_at	HAND2-AS1	lncRNA	9.8e-22	1.56e-23	-1.44
214696_at	MIR22HG	lncRNA	4.63e-21	8.26e-23	-1.44
232291_at	MIR17HG	lncRNA	5.59e-14	2.84e-15	-1.13
230488_s_at	DBH-AS1	lncRNA	9.2e-05	2.16e-05	-1.12
234017_at	LINC00923	lncRNA	0.000146	3.57e-05	1.01
235126_at	FLVCR1-AS1	lncRNA	5.98e-15	2.65e-16	1.02
223977_s_at	LINC00470	lncRNA	2.93e-05	6.23e-06	1.03
229090_at	ZEB1-AS1	lncRNA	2.26e-20	4.44e-22	1.04
227452_at	LINC00511	lncRNA	7.52e-12	5.32e-13	1.11
1558216_at	AFAP1-AS1	lncRNA	1.97e-06	3.39e-07	1.13
235599_at	LINC01139	lncRNA	2.79e-21	4.8e-23	1.21
229754_at	TMEM44-AS1	lncRNA	3.68e-12	2.49e-13	1.22
231233_at	PCAT6	lncRNA	8.82e-22	1.39e-23	1.26
1564200_at	LINC00607	lncRNA	8.77e-13	5.39e-14	1.26
1553145_at	TAPT1-AS1	lncRNA	2.95e-16	1.08e-17	1.39
235217_at	LINC01004	lncRNA	4.15e-15	1.8e-16	1.54
242350_s_at	ST8SIA6-AS1	lncRNA	8.51e-29	3.91e-31	1.62
233170_at	LINC00348	lncRNA	1.15e-20	2.17e-22	3.19
220491_at	HAMP	mRNA	3.29e-51	7.31e-56	-5.26
206727_at	C9	mRNA	6.49e-23	8.49e-25	-5.25
207102_at	AKR1D1	mRNA	2.48e-31	7.2e-34	-4.73
207201_s_at	SLC22A1	mRNA	3.19e-29	1.32e-31	-4.71
202992_at	C7	mRNA	1.6e-22	2.24e-24	-4.54
230478_at	OIT3	mRNA	1.11e-44	3.05e-48	-4.45
207804_s_at	FCN2	mRNA	4.71e-42	2.16e-45	-4.36
202409_at	IGF2	mRNA	2.09e-46	4.97e-50	-4.34
220496_at	CLEC1B	mRNA	1.91e-50	1.05e-54	-4.16
206643_at	HAL	mRNA	2.08e-27	1.24e-29	-4.16
214478_at	SPP2	mRNA	5.28e-38	4.83e-41	-4.15
205866_at	FCN3	mRNA	3.74e-46	9.57e-50	-4.08
204704_s_at	ALDOB	mRNA	1.66e-27	9.72e-30	-3.93
201893_x_at	DCN	mRNA	1.57e-22	2.18e-24	-3.9
209189_at	FOS	mRNA	2.33e-32	5.38e-35	-3.88
208383_s_at	PCK1	mRNA	1.77e-31	4.94e-34	-3.81
220801_s_at	HAO2	mRNA	1.2e-41	5.72e-45	-3.75
209696_at	FBP1	mRNA	4.15e-36	5.23e-39	-3.75
217546_at	MT1M	mRNA	1.74e-30	5.95e-33	-3.73
206354_at	SLCO1B3	mRNA	5.14e-21	9.25e-23	-3.73
201744_s_at	LUM	mRNA	7.84e-13	4.77e-14	-3.68
1559065_a_at	CLEC4G	mRNA	1.1e-40	6.86e-44	-3.65
201839_s_at	EPCAM	mRNA	3.81e-20	7.73e-22	-3.64
209301_at	CA2	mRNA	1.46e-26	9.85e-29	-3.63
205984_at	CRHBP	mRNA	6.29e-37	6.78e-40	-3.62
209960_at	HGF	mRNA	1.38e-28	6.47e-31	-3.62
203638_s_at	FGFR2	mRNA	1.67e-23	1.95e-25	-3.57
218002_s_at	CXCL14	mRNA	1.12e-46	2.25e-50	-3.5
223699_at	CNDP1	mRNA	7.48e-30	2.85e-32	-3.49
225316_at	MFSD2A	mRNA	3.11e-43	9.68e-47	-3.48
205819_at	MARCO	mRNA	2.64e-28	1.33e-30	-3.48
210328_at	GNMT	mRNA	4.1e-24	4.2e-26	-3.43
207608_x_at	CYP1A2	mRNA	5.41e-27	3.44e-29	-3.42
205943_at	TDO2	mRNA	1.2e-27	6.65e-30	-3.4
206754_s_at	CYP2B6	mRNA	1.91e-25	1.55e-27	-3.38
242817_at	PGLYRP2	mRNA	1.43e-22	1.98e-24	-3.37
230964_at	FREM2	mRNA	1.4e-35	1.92e-38	-3.33
203666_at	CXCL12	mRNA	2.92e-34	4.92e-37	-3.33
202768_at	FOSB	mRNA	6.2e-23	8.03e-25	-3.31
205498_at	GHR	mRNA	1.56e-28	7.46e-31	-3.29
206424_at	CYP26A1	mRNA	1.01e-31	2.7e-34	-3.28
237765_at	SLC25A47	mRNA	2.07e-47	3.78e-51	-3.27
205225_at	ESR1	mRNA	7.8e-43	2.85e-46	-3.23
229831_at	CNTN3	mRNA	6.15e-24	6.68e-26	-3.23
207995_s_at	CLEC4M	mRNA	1.25e-35	1.67e-38	-3.22
202237_at	NNMT	mRNA	1.6e-17	4.8e-19	-3.2
204818_at	HSD17B2	mRNA	1.04e-23	1.17e-25	-3.18
207574_s_at	GADD45B	mRNA	1.5e-41	7.42e-45	-3.17
220116_at	KCNN2	mRNA	1.78e-29	7.18e-32	-3.17
1494_f_at	CYP2A6	mRNA	8.83e-24	9.77e-26	-3.16
208147_s_at	CYP2C8	mRNA	7.3e-27	4.76e-29	-3.15
229230_at	SLC51A	mRNA	4.43e-21	7.87e-23	-3.14
204955_at	SRPX	mRNA	2.84e-20	5.63e-22	-3.12
205306_x_at	KMO	mRNA	3.61e-32	8.45e-35	-3.11
207262_at	APOF	mRNA	2.53e-30	9.03e-33	-3.11
209469_at	GPM6A	mRNA	1.75e-17	5.29e-19	-3.1
237350_at	TTC36	mRNA	1.96e-42	7.62e-46	-3.09
219014_at	PLAC8	mRNA	3.94e-32	9.58e-35	-3.07
209291_at	ID4	mRNA	4.25e-27	2.67e-29	-3.06
219313_at	GRAMD1C	mRNA	2.5e-36	2.84e-39	-3.03
226863_at	FAM110C	mRNA	9.47e-19	2.38e-20	-2.98
214621_at	GYS2	mRNA	6.56e-23	8.6e-25	-2.97
1568638_a_at	IDO2	mRNA	5.46e-35	8.19e-38	-2.96
207584_at	LPA	mRNA	3.99e-23	4.97e-25	-2.96
1553977_a_at	CYP39A1	mRNA	4.19e-30	1.55e-32	-2.95
238160_at	ACOT12	mRNA	8.6e-25	7.74e-27	-2.95
205892_s_at	FABP1	mRNA	1.38e-21	2.24e-23	-2.94
1558549_s_at	VNN1	mRNA	1.09e-24	9.93e-27	-2.92
205939_at	CYP3A7	mRNA	9.01e-25	8.16e-27	-2.91
209540_at	IGF1	mRNA	1e-23	1.13e-25	-2.9
206172_at	IL13RA2	mRNA	1.76e-22	2.5e-24	-2.88
210168_at	C6	mRNA	3.08e-18	8.29e-20	-2.88
223781_x_at	ADH4	mRNA	3.53e-22	5.26e-24	-2.86
206007_at	PRG4	mRNA	4.02e-35	5.88e-38	-2.85
206030_at	ASPA	mRNA	2.94e-23	3.6e-25	-2.76
212859_x_at	MT1E	mRNA	8.02e-34	1.45e-36	-2.75
219873_at	COLEC11	mRNA	3.91e-25	3.32e-27	-2.75
214142_at	ZG16	mRNA	8.32e-33	1.81e-35	-2.73
205753_at	CRP	mRNA	1.63e-08	1.95e-09	-2.72
208937_s_at	ID1	mRNA	9.32e-22	1.48e-23	-2.71
204745_x_at	MT1G	mRNA	9.65e-30	3.72e-32	-2.7
206461_x_at	MT1H	mRNA	1.74e-31	4.85e-34	-2.69
219087_at	ASPN	mRNA	2.16e-14	1.03e-15	-2.69
210143_at	ANXA10	mRNA	3.55e-25	2.98e-27	-2.68
206680_at	CD5L	mRNA	1.17e-29	4.61e-32	-2.66
210524_x_at	MT1F	mRNA	7.42e-31	2.32e-33	-2.65
206797_at	NAT2	mRNA	1.9e-28	9.25e-31	-2.65
206840_at	AFM	mRNA	3.87e-16	1.46e-17	-2.65
207185_at	SLC10A1	mRNA	2.71e-24	2.67e-26	-2.64
204450_x_at	APOA1	mRNA	1.07e-13	5.67e-15	-2.64
206210_s_at	CETP	mRNA	2.55e-33	5.09e-36	-2.63
208126_s_at	CYP2C18	mRNA	2.3e-25	1.88e-27	-2.63
209795_at	CD69	mRNA	2.85e-16	1.04e-17	-2.63
204326_x_at	MT1X	mRNA	4.58e-29	1.97e-31	-2.62
207820_at	ADH1A	mRNA	1.15e-13	6.15e-15	-2.62
204428_s_at	LCAT	mRNA	2.51e-39	2.02e-42	-2.59
228186_s_at	RSPO3	mRNA	8.73e-40	6.7e-43	-2.58
207256_at	MBL2	mRNA	3.11e-15	1.32e-16	-2.57
205440_s_at	NPY1R	mRNA	3.69e-28	1.89e-30	-2.55
204224_s_at	GCH1	mRNA	2.36e-34	3.93e-37	-2.53
219410_at	TMEM45A	mRNA	5.13e-16	1.97e-17	-2.53
205363_at	BBOX1	mRNA	4.05e-15	1.75e-16	-2.53
206226_at	HRG	mRNA	1.43e-14	6.67e-16	-2.53
232449_at	BCO2	mRNA	1.23e-27	6.83e-30	-2.51
229777_at	CLRN3	mRNA	2.11e-14	1.01e-15	-2.49
212724_at	RND3	mRNA	3.31e-25	2.76e-27	-2.48
203913_s_at	HPGD	mRNA	9.8e-14	5.14e-15	-2.48
1431_at	CYP2E1	mRNA	1.73e-07	2.48e-08	-2.48
218162_at	OLFML3	mRNA	5.47e-23	7.05e-25	-2.46
223605_at	SLC25A18	mRNA	1.35e-19	2.95e-21	-2.46
208370_s_at	RCAN1	mRNA	3.75e-32	8.85e-35	-2.44
206070_s_at	EPHA3	mRNA	1.7e-14	8.01e-16	-2.44
206753_at	RDH16	mRNA	6.94e-29	3.11e-31	-2.43
205768_s_at	SLC27A2	mRNA	3.27e-19	7.62e-21	-2.42
210521_s_at	FETUB	mRNA	9.57e-18	2.8e-19	-2.42
230438_at	TBX15	mRNA	2.78e-27	1.7e-29	-2.41
212185_x_at	MT2A	mRNA	1.89e-33	3.67e-36	-2.4
207420_at	COLEC10	mRNA	2.68e-26	1.88e-28	-2.4
222162_s_at	ADAMTS1	mRNA	6.94e-21	1.27e-22	-2.4
219954_s_at	GBA3	mRNA	3.52e-22	5.23e-24	-2.38
208078_s_at	SIK1	mRNA	1.19e-31	3.24e-34	-2.37
201743_at	CD14	mRNA	3.33e-19	7.77e-21	-2.35
211456_x_at	MT1HL1	mRNA	8.33e-31	2.65e-33	-2.34
206385_s_at	ANK3	mRNA	2.62e-21	4.48e-23	-2.31
207218_at	F9	mRNA	3.51e-13	2.03e-14	-2.31
222071_s_at	SLCO4C1	mRNA	4.93e-23	6.31e-25	-2.3
209116_x_at	HBB	mRNA	3.27e-16	1.21e-17	-2.29
207076_s_at	ASS1	mRNA	1.3e-36	1.42e-39	-2.27
206068_s_at	ACADL	mRNA	7.66e-18	2.2e-19	-2.27
207409_at	LECT2	mRNA	2.58e-08	3.2e-09	-2.27
208813_at	GOT1	mRNA	7.96e-23	1.05e-24	-2.26
229641_at	CCBE1	mRNA	1.78e-29	7.18e-32	-2.25
210095_s_at	IGFBP3	mRNA	8.89e-23	1.19e-24	-2.25
227099_s_at	C11orf96	mRNA	2.71e-22	3.95e-24	-2.24
210013_at	HPX	mRNA	7.12e-13	4.31e-14	-2.24
214382_at	UNC93A	mRNA	3.32e-18	8.98e-20	-2.22
223737_x_at	CHST9	mRNA	4.78e-27	3.02e-29	-2.21
232235_at	DSEL	mRNA	1.29e-21	2.09e-23	-2.2
204472_at	GEM	mRNA	1.4e-13	7.6e-15	-2.2
207027_at	HGFAC	mRNA	8.42e-27	5.56e-29	-2.19
205043_at	CFTR	mRNA	1.06e-21	1.69e-23	-2.18
206119_at	BHMT	mRNA	5.88e-16	2.27e-17	-2.18
214421_x_at	CYP2C9	mRNA	1.86e-21	3.09e-23	-2.17
219778_at	ZFPM2	mRNA	4.9e-16	1.87e-17	-2.16
228844_at	SLC13A5	mRNA	1.1e-12	6.86e-14	-2.16
201328_at	ETS2	mRNA	4.45e-33	9.12e-36	-2.15
229331_at	SPATA18	mRNA	1.98e-18	5.19e-20	-2.15
201041_s_at	DUSP1	mRNA	4.48e-26	3.33e-28	-2.14
1555612_s_at	G6PC	mRNA	1.74e-15	7.15e-17	-2.14
209457_at	DUSP5	mRNA	5.51e-27	3.52e-29	-2.13
204998_s_at	ATF5	mRNA	4.63e-23	5.89e-25	-2.13
208131_s_at	PTGIS	mRNA	7.5e-17	2.49e-18	-2.13
206177_s_at	ARG1	mRNA	1.67e-11	1.25e-12	-2.13
1569203_at	CXCL2	mRNA	1.35e-23	1.55e-25	-2.1
227742_at	CLIC6	mRNA	2.94e-21	5.07e-23	-2.1
205044_at	GABRP	mRNA	6.92e-18	1.96e-19	-2.1
207773_x_at	CYP3A43	mRNA	4.75e-16	1.81e-17	-2.1
205302_at	IGFBP1	mRNA	5.23e-14	2.65e-15	-2.1
205357_s_at	AGTR1	mRNA	1.45e-28	6.86e-31	-2.09
206024_at	HPD	mRNA	6.9e-10	6.63e-11	-2.09
220446_s_at	CHST4	mRNA	1.08e-23	1.22e-25	-2.08
202431_s_at	MYC	mRNA	1.99e-16	7.08e-18	-2.08
221188_s_at	CIDEB	mRNA	3.22e-30	1.18e-32	-2.07
210397_at	DEFB1	mRNA	4.02e-11	3.2e-12	-2.07
225557_at	CSRNP1	mRNA	3.79e-32	9.08e-35	-2.06
213245_at	ADCY1	mRNA	3.57e-16	1.33e-17	-2.06
203372_s_at	SOCS2	mRNA	2.28e-28	1.14e-30	-2.04
220070_at	KDM8	mRNA	1.92e-48	2.8e-52	-2.03
220114_s_at	STAB2	mRNA	1.96e-42	8.25e-46	-2.03
205478_at	PPP1R1A	mRNA	2.76e-30	1e-32	-2.02
220604_x_at	FTCD	mRNA	1.62e-22	2.26e-24	-2.02
201531_at	ZFP36	mRNA	1.33e-28	6.21e-31	-2.01
201693_s_at	EGR1	mRNA	1.8e-26	1.23e-28	-2.01
220186_s_at	CDHR2	mRNA	1.36e-29	5.45e-32	-2
206417_at	CNGA1	mRNA	2.21e-30	7.75e-33	-1.99
217757_at	A2M	mRNA	8.74e-26	6.83e-28	-1.99
201261_x_at	BGN	mRNA	2.6e-19	5.98e-21	-1.99
204438_at	MRC1	mRNA	1.03e-11	7.43e-13	-1.99
215785_s_at	CYFIP2	mRNA	9.86e-23	1.33e-24	-1.98
206938_at	SRD5A2	mRNA	9.77e-15	4.43e-16	-1.98
227695_at	GLYATL1	mRNA	3.61e-26	2.62e-28	-1.97
215129_at	PIK3C2G	mRNA	2.33e-19	5.32e-21	-1.97
204685_s_at	ATP2B2	mRNA	7.07e-10	6.81e-11	-1.97
202988_s_at	RGS1	mRNA	9.78e-08	1.34e-08	-1.97
226745_at	CYP4V2	mRNA	5.37e-28	2.83e-30	-1.96
204836_at	GLDC	mRNA	5e-18	1.39e-19	-1.96
208190_s_at	LSR	mRNA	8.26e-18	2.39e-19	-1.96
219564_at	KCNJ16	mRNA	3.3e-17	1.03e-18	-1.96
205227_at	IL1RAP	mRNA	1.34e-35	1.81e-38	-1.95
203574_at	NFIL3	mRNA	6.51e-20	1.37e-21	-1.95
205799_s_at	SLC3A1	mRNA	1.54e-06	2.6e-07	-1.95
206336_at	CXCL6	mRNA	1.69e-06	2.88e-07	-1.94
229819_at	A1BG	mRNA	2.49e-12	1.63e-13	-1.93
213285_at	TMEM30B	mRNA	2.11e-23	2.52e-25	-1.92
213874_at	SERPINA4	mRNA	3.2e-17	9.98e-19	-1.92
226181_at	TUBE1	mRNA	7.64e-31	2.42e-33	-1.91
1552440_at	GPR182	mRNA	1.51e-30	5.08e-33	-1.91
204301_at	KBTBD11	mRNA	6.31e-25	5.48e-27	-1.91
206979_at	C8B	mRNA	1.4e-22	1.93e-24	-1.9
224061_at	INMT	mRNA	1.17e-16	3.97e-18	-1.9
220794_at	GREM2	mRNA	2.68e-16	9.79e-18	-1.9
213375_s_at	N4BP2L1	mRNA	7.95e-33	1.71e-35	-1.89
219343_at	CDC37L1	mRNA	8.44e-28	4.6e-30	-1.89
219737_s_at	PCDH9	mRNA	7.75e-24	8.49e-26	-1.89
224243_at	APOA5	mRNA	1.09e-20	2.04e-22	-1.89
201473_at	JUNB	mRNA	2.86e-26	2.03e-28	-1.88
219277_s_at	OGDHL	mRNA	1.14e-22	1.55e-24	-1.88
209369_at	ANXA3	mRNA	2.52e-14	1.22e-15	-1.88
206666_at	GZMK	mRNA	9.14e-14	4.78e-15	-1.88
207651_at	GPR171	mRNA	4.04e-13	2.36e-14	-1.88
202145_at	LY6E	mRNA	3.14e-27	1.93e-29	-1.87
210002_at	GATA6	mRNA	4.56e-19	1.09e-20	-1.87
210587_at	INHBE	mRNA	1.76e-13	9.68e-15	-1.87
216058_s_at	CYP2C19	mRNA	1.49e-22	2.06e-24	-1.86
201599_at	OAT	mRNA	4.19e-22	6.29e-24	-1.86
1554837_a_at	CYP4A11	mRNA	6.31e-20	1.32e-21	-1.86
203562_at	FEZ1	mRNA	5.65e-28	3e-30	-1.85
204621_s_at	NR4A2	mRNA	2.12e-17	6.45e-19	-1.85
229435_at	GLIS3	mRNA	6.42e-17	2.11e-18	-1.85
207041_at	MASP2	mRNA	5.96e-16	2.3e-17	-1.85
214180_at	MAN1C1	mRNA	9.73e-26	7.64e-28	-1.84
230602_at	ACMSD	mRNA	3.14e-20	6.29e-22	-1.84
205328_at	CLDN10	mRNA	5.96e-16	2.31e-17	-1.83
201565_s_at	ID2	mRNA	1.54e-37	1.55e-40	-1.82
1555539_at	SDS	mRNA	8.2e-18	2.37e-19	-1.82
204607_at	HMGCS2	mRNA	2.63e-12	1.74e-13	-1.82
1558603_at	PLG	mRNA	3.73e-28	1.92e-30	-1.81
201739_at	SGK1	mRNA	3.31e-15	1.42e-16	-1.81
205860_x_at	FOLH1	mRNA	4.25e-18	1.17e-19	-1.8
209660_at	TTR	mRNA	1.75e-11	1.32e-12	-1.8
209365_s_at	ECM1	mRNA	8.89e-32	2.33e-34	-1.79
221848_at	ZGPAT	mRNA	4.41e-29	1.86e-31	-1.79
227727_at	MRGPRF	mRNA	1.4e-22	1.93e-24	-1.79
202464_s_at	PFKFB3	mRNA	1.03e-15	4.13e-17	-1.79
221008_s_at	ETNPPL	mRNA	2.63e-14	1.27e-15	-1.79
209122_at	PLIN2	mRNA	7.08e-30	2.68e-32	-1.78
213478_at	KAZN	mRNA	8.95e-24	9.97e-26	-1.78
202391_at	BASP1	mRNA	2.06e-13	1.14e-14	-1.78
206386_at	SERPINA7	mRNA	1.34e-10	1.15e-11	-1.78
207096_at	SAA4	mRNA	2.03e-21	3.39e-23	-1.77
225996_at	LONRF2	mRNA	2.27e-12	1.48e-13	-1.77
1555832_s_at	KLF6	mRNA	3.3e-28	1.69e-30	-1.76
206541_at	KLKB1	mRNA	1.86e-24	1.79e-26	-1.76
226649_at	PANK1	mRNA	2.49e-24	2.44e-26	-1.76
201963_at	ACSL1	mRNA	1.25e-22	1.71e-24	-1.76
231790_at	DMGDH	mRNA	1.98e-21	3.29e-23	-1.76
226096_at	FNDC5	mRNA	8.42e-16	3.31e-17	-1.76
219250_s_at	FLRT3	mRNA	1.03e-12	6.37e-14	-1.76
235737_at	TSLP	mRNA	1.08e-15	4.31e-17	-1.75
203088_at	FBLN5	mRNA	2.46e-10	2.21e-11	-1.75
223343_at	MS4A7	mRNA	3.92e-09	4.24e-10	-1.75
224657_at	ERRFI1	mRNA	6.38e-26	4.83e-28	-1.74
205433_at	BCHE	mRNA	1.12e-16	3.81e-18	-1.73
203680_at	PRKAR2B	mRNA	5.68e-15	2.51e-16	-1.73
207874_s_at	CFHR3	mRNA	1.05e-10	8.91e-12	-1.73
209443_at	SERPINA5	mRNA	9.49e-18	2.77e-19	-1.72
206618_at	IL18R1	mRNA	1.99e-31	5.67e-34	-1.71
206380_s_at	CFP	mRNA	1.87e-26	1.29e-28	-1.71
204483_at	ENO3	mRNA	4.29e-18	1.18e-19	-1.7
200730_s_at	PTP4A1	mRNA	5.17e-14	2.62e-15	-1.7
201625_s_at	INSIG1	mRNA	3.18e-13	1.83e-14	-1.7
206010_at	HABP2	mRNA	3.33e-13	1.92e-14	-1.69
206256_at	CPN1	mRNA	4.16e-23	5.22e-25	-1.68
205813_s_at	MAT1A	mRNA	1.48e-19	3.26e-21	-1.68
204337_at	RGS4	mRNA	1.65e-11	1.24e-12	-1.68
203021_at	SLPI	mRNA	5.82e-10	5.54e-11	-1.68
218024_at	MPC1	mRNA	5.24e-35	7.76e-38	-1.67
205384_at	FXYD1	mRNA	1.26e-24	1.17e-26	-1.67
238063_at	TMEM154	mRNA	1.38e-16	4.78e-18	-1.67
219803_at	ANGPTL3	mRNA	5.64e-16	2.17e-17	-1.67
1555345_at	SLC38A4	mRNA	2.88e-15	1.22e-16	-1.67
206140_at	LHX2	mRNA	2.36e-14	1.14e-15	-1.67
210715_s_at	SPINT2	mRNA	2.95e-14	1.44e-15	-1.67
228636_at	BHLHE22	mRNA	1.08e-13	5.72e-15	-1.67
236442_at	DPF3	mRNA	2.12e-28	1.05e-30	-1.66
221009_s_at	ANGPTL4	mRNA	3.32e-22	4.93e-24	-1.66
202241_at	TRIB1	mRNA	3.93e-18	1.07e-19	-1.66
206514_s_at	CYP4F2	mRNA	2.85e-18	7.63e-20	-1.65
206262_at	ADH1C	mRNA	1.31e-11	9.67e-13	-1.65
218935_at	EHD3	mRNA	1.74e-24	1.66e-26	-1.64
201397_at	PHGDH	mRNA	1.2e-20	2.28e-22	-1.64
202388_at	RGS2	mRNA	6.36e-09	7.13e-10	-1.64
218544_s_at	RCL1	mRNA	2.69e-22	3.91e-24	-1.63
226756_at	CCDC71L	mRNA	4.4e-18	1.21e-19	-1.63
210366_at	SLCO1B1	mRNA	3.12e-22	4.6e-24	-1.62
229084_at	CNTN4	mRNA	1.18e-23	1.35e-25	-1.61
204608_at	ASL	mRNA	3.77e-21	6.61e-23	-1.61
221577_x_at	GDF15	mRNA	1.61e-10	1.4e-11	-1.61
209612_s_at	ADH1B	mRNA	1.8e-05	3.68e-06	-1.61
203499_at	EPHA2	mRNA	4.48e-26	3.33e-28	-1.6
209209_s_at	FERMT2	mRNA	3e-24	3e-26	-1.6
211726_s_at	FMO2	mRNA	1.39e-18	3.56e-20	-1.6
211026_s_at	MGLL	mRNA	8.32e-18	2.41e-19	-1.6
230081_at	PLCXD3	mRNA	3.27e-13	1.88e-14	-1.6
220736_at	SLC19A3	mRNA	4.1e-23	5.14e-25	-1.59
232428_at	MOGAT2	mRNA	1.45e-20	2.78e-22	-1.59
205789_at	CD1D	mRNA	5.25e-19	1.27e-20	-1.59
206702_at	TEK	mRNA	4.02e-15	1.74e-16	-1.59
209596_at	MXRA5	mRNA	4.83e-14	2.43e-15	-1.59
209821_at	IL33	mRNA	1.57e-11	1.17e-12	-1.58
209606_at	CYTIP	mRNA	1.52e-07	2.15e-08	-1.58
209531_at	GSTZ1	mRNA	7.08e-19	1.75e-20	-1.57
213293_s_at	TRIM22	mRNA	3.57e-15	1.53e-16	-1.57
1556420_s_at	YPEL2	mRNA	4.83e-13	2.87e-14	-1.57
222108_at	AMIGO2	mRNA	6.12e-08	8.11e-09	-1.57
204154_at	CDO1	mRNA	3.11e-07	4.64e-08	-1.57
219991_at	SLC2A9	mRNA	1.4e-22	1.92e-24	-1.56
207735_at	RNF125	mRNA	2.2e-15	9.16e-17	-1.56
208034_s_at	PROZ	mRNA	8.78e-15	3.96e-16	-1.56
219059_s_at	LYVE1	mRNA	8.56e-13	5.26e-14	-1.56
207543_s_at	P4HA1	mRNA	1.37e-12	8.71e-14	-1.56
205826_at	MYOM2	mRNA	5e-24	5.2e-26	-1.55
207330_at	PZP	mRNA	4.88e-21	8.78e-23	-1.55
222705_s_at	SLC25A15	mRNA	1.51e-16	5.27e-18	-1.55
203058_s_at	PAPSS2	mRNA	3.07e-15	1.3e-16	-1.55
223967_at	ANGPTL6	mRNA	1.24e-37	1.2e-40	-1.54
1561336_at	DNASE1L3	mRNA	5.94e-24	6.32e-26	-1.54
207387_s_at	GK	mRNA	3.34e-19	7.81e-21	-1.54
219666_at	MS4A6A	mRNA	8.32e-12	5.93e-13	-1.54
205798_at	IL7R	mRNA	2.03e-09	2.1e-10	-1.54
234980_at	TMEM56	mRNA	4.51e-30	1.68e-32	-1.53
214889_at	FAM149A	mRNA	1.78e-24	1.71e-26	-1.53
201464_x_at	JUN	mRNA	3.14e-24	3.15e-26	-1.53
213661_at	PAMR1	mRNA	9.8e-22	1.56e-23	-1.53
205355_at	ACADSB	mRNA	5.14e-16	1.97e-17	-1.53
225464_at	FRMD6	mRNA	2.52e-14	1.22e-15	-1.53
209309_at	AZGP1	mRNA	7.96e-14	4.13e-15	-1.53
204794_at	DUSP2	mRNA	8.41e-13	5.16e-14	-1.53
206932_at	CH25H	mRNA	5.13e-07	7.96e-08	-1.53
210072_at	CCL19	mRNA	8.4e-07	1.35e-07	-1.53
205530_at	ETFDH	mRNA	2.11e-27	1.26e-29	-1.52
202723_s_at	FOXO1	mRNA	5.27e-19	1.28e-20	-1.51
220180_at	CCDC68	mRNA	7.3e-18	2.09e-19	-1.51
213695_at	PON3	mRNA	1.39e-16	4.82e-18	-1.51
224215_s_at	DLL1	mRNA	3.38e-16	1.26e-17	-1.51
1552280_at	TIMD4	mRNA	1.03e-13	5.41e-15	-1.51
204551_s_at	AHSG	mRNA	8.18e-07	1.32e-07	-1.51
202081_at	IER2	mRNA	1.65e-22	2.31e-24	-1.5
228293_at	DEPDC7	mRNA	2.05e-17	6.24e-19	-1.5
223316_at	CCDC3	mRNA	5.87e-17	1.92e-18	-1.5
204967_at	SHROOM2	mRNA	1.95e-15	8.06e-17	-1.5
232692_at	TDRD6	mRNA	3.52e-14	1.74e-15	-1.5
223798_at	SLC41A2	mRNA	2.52e-12	1.66e-13	-1.5
1553635_s_at	TCTEX1D1	mRNA	2.85e-20	5.66e-22	-1.49
224339_s_at	ANGPTL1	mRNA	1.79e-17	5.4e-19	-1.49
1557545_s_at	RNF165	mRNA	1.19e-12	7.45e-14	-1.49
224724_at	SULF2	mRNA	8.74e-12	6.25e-13	-1.49
205612_at	MMRN1	mRNA	4.63e-11	3.72e-12	-1.49
218901_at	PLSCR4	mRNA	2.61e-30	9.41e-33	-1.48
219181_at	LIPG	mRNA	1.47e-21	2.41e-23	-1.48
206085_s_at	CTH	mRNA	4.78e-15	2.09e-16	-1.48
206963_s_at	NAT8	mRNA	4.82e-13	2.86e-14	-1.48
205998_x_at	CYP3A4	mRNA	4.09e-12	2.79e-13	-1.48
229125_at	KANK4	mRNA	2.83e-09	3e-10	-1.48
220005_at	P2RY13	mRNA	9.9e-09	1.15e-09	-1.48
202376_at	SERPINA3	mRNA	1.48e-07	2.09e-08	-1.48
221215_s_at	RIPK4	mRNA	2.12e-23	2.54e-25	-1.47
205649_s_at	FGA	mRNA	1.23e-16	4.23e-18	-1.47
201300_s_at	PRNP	mRNA	2.07e-09	2.14e-10	-1.47
226818_at	MPEG1	mRNA	9.44e-06	1.83e-06	-1.47
201842_s_at	EFEMP1	mRNA	0.00184	0.000575	-1.47
213632_at	DHODH	mRNA	7.83e-22	1.23e-23	-1.46
225720_at	SYNPO2	mRNA	3.7e-17	1.17e-18	-1.46
220161_s_at	EPB41L4B	mRNA	1.11e-16	3.79e-18	-1.46
217996_at	PHLDA1	mRNA	1.51e-11	1.12e-12	-1.46
223593_at	AADAT	mRNA	3.96e-36	4.92e-39	-1.45
209447_at	SYNE1	mRNA	2.17e-30	7.58e-33	-1.45
205876_at	LIFR	mRNA	1.37e-19	2.99e-21	-1.45
231070_at	IYD	mRNA	5.7e-20	1.18e-21	-1.44
227148_at	PLEKHH2	mRNA	4.45e-11	3.56e-12	-1.44
205968_at	KCNS3	mRNA	8.83e-11	7.4e-12	-1.44
216598_s_at	CCL2	mRNA	2.76e-08	3.45e-09	-1.44
225539_at	ZBTB21	mRNA	3.44e-25	2.88e-27	-1.43
220646_s_at	KLRF1	mRNA	1.6e-22	2.23e-24	-1.43
206629_at	ADAMTSL2	mRNA	2.79e-21	4.81e-23	-1.43
203233_at	IL4R	mRNA	4.81e-21	8.64e-23	-1.43
207220_at	ART4	mRNA	2.9e-20	5.78e-22	-1.43
220622_at	LRRC31	mRNA	1.74e-10	1.53e-11	-1.43
205700_at	HSD17B6	mRNA	4.67e-10	4.39e-11	-1.43
203658_at	SLC25A20	mRNA	9.39e-24	1.05e-25	-1.42
220751_s_at	FAXDC2	mRNA	1.85e-16	6.57e-18	-1.42
229596_at	AMDHD1	mRNA	6.26e-16	2.43e-17	-1.42
210889_s_at	FCGR2B	mRNA	6.04e-12	4.2e-13	-1.42
1405_i_at	CCL5	mRNA	6.17e-10	5.89e-11	-1.42
211339_s_at	ITK	mRNA	2.42e-09	2.53e-10	-1.42
211742_s_at	EVI2B	mRNA	8.07e-07	1.3e-07	-1.42
204057_at	IRF8	mRNA	3.25e-25	2.7e-27	-1.41
204793_at	GPRASP1	mRNA	7.21e-25	6.36e-27	-1.41
225922_at	FNIP2	mRNA	1.58e-17	4.73e-19	-1.41
207526_s_at	IL1RL1	mRNA	3.09e-11	2.41e-12	-1.41
212599_at	AUTS2	mRNA	4.8e-11	3.87e-12	-1.41
225283_at	ARRDC4	mRNA	1.35e-10	1.17e-11	-1.41
231376_at	UPP2	mRNA	1.18e-05	2.34e-06	-1.41
219340_s_at	CLN8	mRNA	1.08e-30	3.53e-33	-1.4
235728_at	ZFP3	mRNA	5.67e-21	1.03e-22	-1.4
218186_at	RAB25	mRNA	2.56e-17	7.9e-19	-1.4
203645_s_at	CD163	mRNA	2.1e-05	4.35e-06	-1.4
212671_s_at	HLA-DQA2	mRNA	0.00137	0.000415	-1.4
225853_at	GNPNAT1	mRNA	3.76e-33	7.56e-36	-1.39
207072_at	IL18RAP	mRNA	7.15e-21	1.32e-22	-1.39
219395_at	ESRP2	mRNA	1.41e-20	2.7e-22	-1.39
213279_at	DHRS1	mRNA	1.13e-17	3.32e-19	-1.39
209368_at	EPHX2	mRNA	2.85e-15	1.21e-16	-1.39
202982_s_at	ACOT1	mRNA	1.15e-14	5.29e-16	-1.39
201852_x_at	COL3A1	mRNA	9.87e-05	2.33e-05	-1.39
203002_at	AMOTL2	mRNA	6.27e-22	9.74e-24	-1.38
1557126_a_at	PLD1	mRNA	3.53e-18	9.57e-20	-1.38
204363_at	F3	mRNA	3.64e-13	2.11e-14	-1.38
210517_s_at	AKAP12	mRNA	4.19e-09	4.56e-10	-1.38
1565228_s_at	ALB	mRNA	3.24e-06	5.82e-07	-1.38
219132_at	PELI2	mRNA	2.69e-19	6.18e-21	-1.37
228463_at	FOXA3	mRNA	1.01e-18	2.54e-20	-1.37
206469_x_at	AKR7A3	mRNA	2.36e-15	9.86e-17	-1.37
202459_s_at	LPIN2	mRNA	2.89e-24	2.89e-26	-1.36
218041_x_at	SLC38A2	mRNA	1.58e-23	1.85e-25	-1.36
230867_at	COL6A6	mRNA	6.27e-22	9.75e-24	-1.36
215689_s_at	SHBG	mRNA	9.93e-20	2.13e-21	-1.36
214470_at	KLRB1	mRNA	1.04e-11	7.54e-13	-1.36
202917_s_at	S100A8	mRNA	3.08e-06	5.52e-07	-1.36
220224_at	HAO1	mRNA	7.07e-14	3.63e-15	-1.35
228274_at	SDSL	mRNA	1.21e-10	1.03e-11	-1.35
205820_s_at	APOC3	mRNA	6.85e-06	1.3e-06	-1.35
215712_s_at	IGFALS	mRNA	2.69e-30	9.75e-33	-1.34
229770_at	GLT1D1	mRNA	5.43e-29	2.4e-31	-1.34
202670_at	MAP2K1	mRNA	2.02e-27	1.2e-29	-1.34
207655_s_at	BLNK	mRNA	2.4e-21	4.07e-23	-1.34
218330_s_at	NAV2	mRNA	3.58e-20	7.23e-22	-1.34
209016_s_at	KRT7	mRNA	7.77e-08	1.05e-08	-1.34
203083_at	THBS2	mRNA	4.65e-05	1.03e-05	-1.34
205790_at	SKAP1	mRNA	3.39e-31	1e-33	-1.33
241986_at	BMPER	mRNA	2.3e-25	1.88e-27	-1.33
211489_at	ADRA1A	mRNA	4.36e-22	6.6e-24	-1.33
206118_at	STAT4	mRNA	1.67e-19	3.7e-21	-1.33
225975_at	PCDH18	mRNA	1.78e-13	9.8e-15	-1.33
205382_s_at	CFD	mRNA	1.34e-10	1.15e-11	-1.33
206344_at	PON1	mRNA	2.02e-10	1.79e-11	-1.33
203924_at	GSTA1	mRNA	3.4e-09	3.65e-10	-1.33
226370_at	KLHL15	mRNA	2.61e-30	9.37e-33	-1.32
205935_at	FOXF1	mRNA	6.8e-18	1.92e-19	-1.32
238008_at	PRR18	mRNA	7.85e-18	2.26e-19	-1.32
218285_s_at	BDH2	mRNA	1.41e-24	1.33e-26	-1.31
227443_at	LURAP1L	mRNA	5.51e-15	2.43e-16	-1.31
211423_s_at	SC5D	mRNA	1.08e-11	7.84e-13	-1.31
223467_at	RASD1	mRNA	2.55e-11	1.96e-12	-1.31
220112_at	ANKRD55	mRNA	2.68e-26	1.89e-28	-1.3
205627_at	CDA	mRNA	2.75e-23	3.36e-25	-1.3
206287_s_at	ITIH4	mRNA	3.73e-18	1.02e-19	-1.3
220148_at	ALDH8A1	mRNA	4.19e-16	1.59e-17	-1.3
212865_s_at	COL14A1	mRNA	5.43e-08	7.13e-09	-1.3
212459_x_at	SUCLG2	mRNA	2.35e-13	1.32e-14	-1.29
207254_at	SLC15A1	mRNA	7.67e-11	6.37e-12	-1.29
1570433_at	TMPRSS2	mRNA	5.37e-10	5.09e-11	-1.29
205141_at	ANG	mRNA	2.48e-09	2.6e-10	-1.29
219733_s_at	SLC27A5	mRNA	5.55e-08	7.3e-09	-1.29
202350_s_at	MATN2	mRNA	5.89e-08	7.77e-09	-1.29
208470_s_at	HPR	mRNA	1.51e-07	2.14e-08	-1.29
225502_at	DOCK8	mRNA	1.11e-06	1.82e-07	-1.29
209763_at	CHRDL1	mRNA	1.34e-06	2.25e-07	-1.29
215078_at	SOD2	mRNA	0.000365	9.69e-05	-1.29
206450_at	DBH	mRNA	1.25e-24	1.16e-26	-1.28
214765_s_at	NAAA	mRNA	4.2e-23	5.28e-25	-1.28
225616_at	SPRYD4	mRNA	2.65e-20	5.25e-22	-1.28
207621_s_at	PEMT	mRNA	1.39e-16	4.8e-18	-1.28
212067_s_at	C1R	mRNA	2.25e-14	1.08e-15	-1.28
1563478_at	KIAA1671	mRNA	9.17e-13	5.66e-14	-1.28
205758_at	CD8A	mRNA	3.04e-11	2.37e-12	-1.28
207826_s_at	ID3	mRNA	3.9e-10	3.63e-11	-1.28
203887_s_at	THBD	mRNA	2.55e-07	3.76e-08	-1.28
221868_at	PAIP2B	mRNA	3.12e-22	4.6e-24	-1.27
205430_at	BMP5	mRNA	8.71e-18	2.53e-19	-1.27
205392_s_at	CCL14	mRNA	1.85e-14	8.75e-16	-1.27
223217_s_at	NFKBIZ	mRNA	5.78e-18	1.62e-19	-1.26
204675_at	SRD5A1	mRNA	9.62e-18	2.81e-19	-1.26
205633_s_at	ALAS1	mRNA	1.02e-13	5.35e-15	-1.26
205114_s_at	CCL3	mRNA	1.41e-11	1.05e-12	-1.26
229229_at	AGXT2	mRNA	1.01e-10	8.53e-12	-1.26
205911_at	PTH1R	mRNA	7.57e-35	1.18e-37	-1.25
205019_s_at	VIPR1	mRNA	2.93e-26	2.09e-28	-1.25
213820_s_at	STARD5	mRNA	1.43e-22	1.97e-24	-1.25
202465_at	PCOLCE	mRNA	5.47e-19	1.33e-20	-1.25
215506_s_at	DIRAS3	mRNA	1.27e-15	5.12e-17	-1.25
203665_at	HMOX1	mRNA	1.04e-14	4.73e-16	-1.25
204912_at	IL10RA	mRNA	1.06e-09	1.06e-10	-1.25
207810_at	F13B	mRNA	1.1e-09	1.09e-10	-1.25
1559584_a_at	C16orf54	mRNA	2.42e-08	3e-09	-1.25
206710_s_at	EPB41L3	mRNA	1.18e-05	2.33e-06	-1.25
204304_s_at	PROM1	mRNA	3.67e-05	7.95e-06	-1.25
206305_s_at	C8A	mRNA	4.9e-18	1.36e-19	-1.24
210653_s_at	BCKDHB	mRNA	9.9e-13	6.14e-14	-1.24
206115_at	EGR3	mRNA	6.31e-09	7.06e-10	-1.24
1552362_a_at	LEAP2	mRNA	7.29e-09	8.26e-10	-1.24
204042_at	WASF3	mRNA	2.76e-07	4.1e-08	-1.24
205590_at	RASGRP1	mRNA	1.99e-06	3.43e-07	-1.24
220365_at	ALLC	mRNA	4.66e-23	5.94e-25	-1.23
201060_x_at	STOM	mRNA	4.54e-21	8.09e-23	-1.23
213122_at	TSPYL5	mRNA	8.39e-19	2.09e-20	-1.23
203725_at	GADD45A	mRNA	2.96e-16	1.09e-17	-1.23
229523_at	TMEM200C	mRNA	7.48e-14	3.87e-15	-1.23
210751_s_at	RGN	mRNA	1.39e-13	7.52e-15	-1.23
228648_at	LRG1	mRNA	4.8e-11	3.87e-12	-1.23
201695_s_at	PNP	mRNA	1.07e-10	9.13e-12	-1.23
226403_at	TMC4	mRNA	2.74e-09	2.9e-10	-1.23
204451_at	FZD1	mRNA	2.35e-08	2.9e-09	-1.23
205041_s_at	ORM2	mRNA	1.13e-07	1.57e-08	-1.23
232494_at	CYP8B1	mRNA	0.000271	7.01e-05	-1.23
204462_s_at	SLC16A2	mRNA	8.21e-23	1.09e-24	-1.22
204011_at	SPRY2	mRNA	1.4e-22	1.93e-24	-1.22
205566_at	ABHD2	mRNA	2.11e-20	4.12e-22	-1.22
203509_at	SORL1	mRNA	2.68e-20	5.32e-22	-1.22
232000_at	TTC39B	mRNA	3.07e-19	7.11e-21	-1.22
218504_at	FAHD2A	mRNA	2.98e-14	1.46e-15	-1.22
215440_s_at	BEX4	mRNA	6.34e-10	6.06e-11	-1.22
210301_at	XDH	mRNA	2.71e-17	8.39e-19	-1.21
219427_at	FAT4	mRNA	2.13e-16	7.65e-18	-1.21
213547_at	CAND2	mRNA	9.08e-16	3.59e-17	-1.21
219179_at	DACT1	mRNA	4.15e-11	3.31e-12	-1.21
217858_s_at	ARMCX3	mRNA	1.39e-10	1.2e-11	-1.21
212713_at	MFAP4	mRNA	2.28e-10	2.04e-11	-1.21
204018_x_at	HBA1	mRNA	1.56e-09	1.58e-10	-1.21
220393_at	LGSN	mRNA	4.37e-09	4.77e-10	-1.21
204920_at	CPS1	mRNA	6.53e-06	1.23e-06	-1.21
203915_at	CXCL9	mRNA	0.00145	0.00044	-1.21
203139_at	DAPK1	mRNA	2.15e-21	3.61e-23	-1.2
1552281_at	SLC39A5	mRNA	3.48e-18	9.43e-20	-1.2
203640_at	MBNL2	mRNA	2.34e-16	8.44e-18	-1.2
1553972_a_at	CBS	mRNA	1.34e-14	6.2e-16	-1.2
212646_at	RFTN1	mRNA	4.75e-14	2.39e-15	-1.2
205040_at	ORM1	mRNA	7.83e-13	4.77e-14	-1.2
238440_at	CLYBL	mRNA	7.19e-11	5.95e-12	-1.2
204121_at	GADD45G	mRNA	1.63e-09	1.67e-10	-1.2
201858_s_at	SRGN	mRNA	0.000168	4.17e-05	-1.2
209694_at	PTS	mRNA	1.11e-21	1.78e-23	-1.19
214735_at	IPCEF1	mRNA	5.16e-19	1.25e-20	-1.19
209340_at	UAP1	mRNA	1.38e-18	3.53e-20	-1.19
206756_at	CHST7	mRNA	5.47e-18	1.53e-19	-1.19
215501_s_at	DUSP10	mRNA	1.4e-15	5.7e-17	-1.19
201920_at	SLC20A1	mRNA	2.43e-13	1.37e-14	-1.19
205480_s_at	UGP2	mRNA	5.8e-13	3.47e-14	-1.19
218854_at	DSE	mRNA	4.86e-10	4.58e-11	-1.19
205488_at	GZMA	mRNA	6.06e-08	8.04e-09	-1.19
214069_at	ACSM2A	mRNA	6.16e-06	1.16e-06	-1.19
213429_at	BICC1	mRNA	0.000117	2.81e-05	-1.19
200708_at	GOT2	mRNA	1.3e-24	1.22e-26	-1.18
235148_at	KRTCAP3	mRNA	2.27e-24	2.22e-26	-1.18
212923_s_at	PXDC1	mRNA	1.57e-22	2.18e-24	-1.18
203242_s_at	PDLIM5	mRNA	2.15e-18	5.66e-20	-1.18
203615_x_at	SULT1A1	mRNA	2.48e-13	1.4e-14	-1.18
206606_at	LIPC	mRNA	1.74e-12	1.12e-13	-1.18
209514_s_at	RAB27A	mRNA	3.78e-11	2.98e-12	-1.18
208290_s_at	EIF5	mRNA	7.12e-11	5.89e-12	-1.18
204103_at	CCL4	mRNA	2.69e-10	2.43e-11	-1.18
205158_at	RNASE4	mRNA	5.57e-08	7.33e-09	-1.18
209395_at	CHI3L1	mRNA	0.00399	0.00136	-1.18
218182_s_at	CLDN1	mRNA	3.4e-17	1.07e-18	-1.17
206325_at	SERPINA6	mRNA	2.01e-14	9.59e-16	-1.17
203603_s_at	ZEB2	mRNA	1.67e-06	2.84e-07	-1.17
218983_at	C1RL	mRNA	5.15e-25	4.43e-27	-1.16
205073_at	CYP2J2	mRNA	1.94e-22	2.77e-24	-1.16
212229_s_at	FBXO21	mRNA	1.42e-20	2.71e-22	-1.16
219274_at	TSPAN12	mRNA	4.96e-14	2.5e-15	-1.16
218332_at	BEX1	mRNA	4.63e-12	3.18e-13	-1.16
206697_s_at	HP	mRNA	1.78e-07	2.56e-08	-1.16
224839_s_at	GPT2	mRNA	8.38e-16	3.29e-17	-1.15
228532_at	C1orf162	mRNA	1.86e-14	8.78e-16	-1.15
210177_at	TRIM15	mRNA	9.18e-11	7.71e-12	-1.15
205075_at	SERPINF2	mRNA	1.64e-08	1.96e-09	-1.15
219902_at	BHMT2	mRNA	1.52e-05	3.07e-06	-1.15
225212_at	SLC25A25	mRNA	1.1e-18	2.78e-20	-1.14
236295_s_at	NLRC3	mRNA	3.18e-15	1.36e-16	-1.14
202393_s_at	KLF10	mRNA	4.3e-12	2.95e-13	-1.14
221803_s_at	NRBF2	mRNA	1.94e-11	1.47e-12	-1.14
206641_at	TNFRSF17	mRNA	2.06e-10	1.83e-11	-1.14
205234_at	SLC16A4	mRNA	3.56e-08	4.54e-09	-1.14
202957_at	HCLS1	mRNA	1.38e-07	1.94e-08	-1.14
201005_at	CD9	mRNA	6.88e-07	1.09e-07	-1.14
209242_at	PEG3	mRNA	0.000367	9.74e-05	-1.14
202025_x_at	ACAA1	mRNA	5.98e-24	6.37e-26	-1.13
220107_s_at	ZC2HC1C	mRNA	1.38e-20	2.64e-22	-1.13
204119_s_at	ADK	mRNA	3.62e-17	1.15e-18	-1.13
226807_at	ZFP1	mRNA	1.78e-13	9.8e-15	-1.13
219622_at	RAB20	mRNA	2.66e-13	1.5e-14	-1.13
202016_at	MEST	mRNA	4.51e-13	2.66e-14	-1.13
205582_s_at	GGT5	mRNA	7.89e-13	4.81e-14	-1.13
222102_at	GSTA3	mRNA	8.04e-12	5.71e-13	-1.13
238429_at	TMEM71	mRNA	8.57e-12	6.12e-13	-1.13
239093_at	HOGA1	mRNA	8.21e-10	8e-11	-1.13
1554830_a_at	STEAP3	mRNA	1e-08	1.16e-09	-1.13
224650_at	MAL2	mRNA	6.53e-05	1.49e-05	-1.13
206453_s_at	NDRG2	mRNA	1.06e-22	1.43e-24	-1.12
226785_at	ATP11C	mRNA	7.91e-17	2.63e-18	-1.12
203335_at	PHYH	mRNA	2.76e-14	1.34e-15	-1.12
202071_at	SDC4	mRNA	7.47e-14	3.86e-15	-1.12
203408_s_at	SATB1	mRNA	4.14e-13	2.43e-14	-1.12
209980_s_at	SHMT1	mRNA	8.52e-12	6.07e-13	-1.12
207883_s_at	TFR2	mRNA	9.28e-09	1.07e-09	-1.12
207544_s_at	ADH6	mRNA	4.43e-07	6.79e-08	-1.12
1570505_at	ABCB4	mRNA	3.99e-05	8.7e-06	-1.12
202441_at	ERLIN1	mRNA	4.45e-42	1.95e-45	-1.11
203500_at	GCDH	mRNA	3.46e-21	6.03e-23	-1.11
203659_s_at	TRIM13	mRNA	3.41e-19	7.98e-21	-1.11
203453_at	SCNN1A	mRNA	7.47e-15	3.34e-16	-1.11
218774_at	DCPS	mRNA	2.02e-12	1.31e-13	-1.11
210116_at	SH2D1A	mRNA	3.78e-09	4.08e-10	-1.11
213438_at	NFASC	mRNA	7.99e-09	9.11e-10	-1.11
220110_s_at	NXF3	mRNA	4.03e-29	1.69e-31	-1.1
232158_x_at	NIPAL1	mRNA	7.48e-25	6.67e-27	-1.1
202794_at	INPP1	mRNA	8.82e-19	2.2e-20	-1.1
205730_s_at	ABLIM3	mRNA	4.05e-18	1.11e-19	-1.1
223278_at	GJB2	mRNA	4.23e-17	1.36e-18	-1.1
221833_at	LONP2	mRNA	1.1e-15	4.41e-17	-1.1
226597_at	REEP6	mRNA	2.37e-11	1.82e-12	-1.1
203767_s_at	STS	mRNA	9.12e-11	7.66e-12	-1.1
219140_s_at	RBP4	mRNA	2.89e-08	3.63e-09	-1.1
207957_s_at	PRKCB	mRNA	7.96e-08	1.08e-08	-1.1
202313_at	PPP2R2A	mRNA	8.26e-18	2.39e-19	-1.09
203973_s_at	CEBPD	mRNA	1.07e-17	3.15e-19	-1.09
230677_at	EXOC3L4	mRNA	4.17e-17	1.33e-18	-1.09
212372_at	MYH10	mRNA	3.4e-16	1.27e-17	-1.09
242998_at	RDH12	mRNA	5.6e-16	2.16e-17	-1.09
1556194_a_at	HSPA4L	mRNA	1.6e-14	7.52e-16	-1.09
203646_at	FDX1	mRNA	2.55e-14	1.24e-15	-1.09
229302_at	TMEM178A	mRNA	1.62e-13	8.86e-15	-1.09
205193_at	MAFF	mRNA	1.41e-12	8.98e-14	-1.09
223623_at	C2orf40	mRNA	4.09e-10	3.8e-11	-1.09
206930_at	GLYAT	mRNA	2.43e-06	4.26e-07	-1.09
202953_at	C1QB	mRNA	0.0015	0.000456	-1.09
210565_at	GCGR	mRNA	1.26e-21	2.04e-23	-1.08
227865_at	IDNK	mRNA	1.58e-18	4.07e-20	-1.08
202862_at	FAH	mRNA	2.79e-13	1.58e-14	-1.08
202085_at	TJP2	mRNA	7.23e-13	4.38e-14	-1.08
1552283_s_at	ZDHHC11	mRNA	6.57e-12	4.6e-13	-1.08
1558034_s_at	CP	mRNA	2.04e-08	2.49e-09	-1.08
206065_s_at	DPYS	mRNA	2.92e-08	3.67e-09	-1.08
204163_at	EMILIN1	mRNA	6.24e-08	8.27e-09	-1.08
1569555_at	GDA	mRNA	7.68e-07	1.23e-07	-1.08
209201_x_at	CXCR4	mRNA	6.52e-05	1.48e-05	-1.08
206237_s_at	NRG1	mRNA	1.57e-17	4.71e-19	-1.07
209123_at	QDPR	mRNA	6.41e-16	2.49e-17	-1.07
213800_at	CFH	mRNA	9.9e-12	7.15e-13	-1.07
204534_at	SEBOX	mRNA	1.01e-07	1.39e-08	-1.07
204787_at	VSIG4	mRNA	1.38e-05	2.76e-06	-1.07
202949_s_at	FHL2	mRNA	9.62e-05	2.27e-05	-1.07
233565_s_at	SDCBP2	mRNA	3.68e-15	1.59e-16	-1.06
202861_at	PER1	mRNA	1.61e-12	1.03e-13	-1.06
207537_at	PFKFB1	mRNA	5.69e-12	3.94e-13	-1.06
205682_x_at	APOM	mRNA	2.65e-07	3.92e-08	-1.06
203633_at	CPT1A	mRNA	2.07e-23	2.46e-25	-1.05
1553994_at	NT5E	mRNA	4.57e-19	1.09e-20	-1.05
219559_at	SLC17A9	mRNA	2.62e-18	6.96e-20	-1.05
203799_at	CD302	mRNA	1.23e-16	4.2e-18	-1.05
202269_x_at	GBP1	mRNA	1.85e-14	8.77e-16	-1.05
220773_s_at	GPHN	mRNA	1.38e-13	7.44e-15	-1.05
226065_at	PRICKLE1	mRNA	1.1e-11	8e-13	-1.05
207062_at	IAPP	mRNA	1.58e-09	1.61e-10	-1.05
206100_at	CPM	mRNA	3.58e-08	4.57e-09	-1.05
207498_s_at	CYP2D6	mRNA	5.65e-08	7.45e-09	-1.05
207200_at	OTC	mRNA	1.99e-05	4.1e-06	-1.05
206292_s_at	SULT2A1	mRNA	0.000193	4.84e-05	-1.05
226796_at	ABHD15	mRNA	2.18e-19	4.95e-21	-1.04
235751_s_at	VMO1	mRNA	2.53e-14	1.22e-15	-1.04
219970_at	GIPC2	mRNA	3.05e-13	1.75e-14	-1.04
204385_at	KYNU	mRNA	6.09e-11	4.98e-12	-1.04
205269_at	LCP2	mRNA	4.94e-07	7.64e-08	-1.04
218232_at	C1QA	mRNA	6.9e-05	1.58e-05	-1.04
202833_s_at	SERPINA1	mRNA	0.000139	3.38e-05	-1.04
208894_at	HLA-DRA	mRNA	0.00752	0.00275	-1.04
202309_at	MTHFD1	mRNA	2.66e-16	9.71e-18	-1.03
221234_s_at	BACH2	mRNA	1.04e-10	8.81e-12	-1.03
207630_s_at	CREM	mRNA	1.8e-10	1.58e-11	-1.03
210117_at	SPAG1	mRNA	2.35e-09	2.45e-10	-1.03
226789_at	EMB	mRNA	3.41e-08	4.33e-09	-1.03
212657_s_at	IL1RN	mRNA	4.75e-08	6.2e-09	-1.03
209436_at	SPON1	mRNA	1.8e-05	3.68e-06	-1.03
224367_at	BEX2	mRNA	5.91e-05	1.33e-05	-1.03
1566528_at	CUX2	mRNA	0.000987	0.000289	-1.03
1557116_at	APOL6	mRNA	4.63e-21	8.26e-23	-1.02
204790_at	SMAD7	mRNA	2.28e-16	8.22e-18	-1.02
211828_s_at	TNIK	mRNA	1.21e-14	5.59e-16	-1.02
209277_at	TFPI2	mRNA	1.09e-12	6.79e-14	-1.02
221223_x_at	CISH	mRNA	1.27e-11	9.39e-13	-1.02
205942_s_at	ACSM3	mRNA	2.82e-10	2.56e-11	-1.02
229459_at	FAM19A5	mRNA	8.23e-09	9.4e-10	-1.02
206535_at	SLC2A2	mRNA	0.000695	0.000196	-1.02
213327_s_at	USP12	mRNA	6.04e-22	9.36e-24	-1.01
205042_at	GNE	mRNA	5.96e-21	1.08e-22	-1.01
227336_at	DTX1	mRNA	1.74e-17	5.24e-19	-1.01
210762_s_at	DLC1	mRNA	6.43e-16	2.5e-17	-1.01
203029_s_at	PTPRN2	mRNA	3.63e-13	2.11e-14	-1.01
210056_at	RND1	mRNA	8.49e-10	8.28e-11	-1.01
204271_s_at	EDNRB	mRNA	5.54e-08	7.28e-09	-1.01
225939_at	EIF4E3	mRNA	1.7e-07	2.42e-08	-1.01
220060_s_at	PARPBP	mRNA	6.38e-28	3.4e-30	1.01
226901_at	C17orf58	mRNA	2.26e-22	3.25e-24	1.01
203564_at	FANCG	mRNA	2.31e-20	4.54e-22	1.01
223016_x_at	ZRANB2	mRNA	4.33e-19	1.03e-20	1.01
202679_at	NPC1	mRNA	1.21e-16	4.13e-18	1.01
203805_s_at	FANCA	mRNA	3.29e-16	1.22e-17	1.01
208808_s_at	HMGB2	mRNA	6.53e-14	3.34e-15	1.01
219888_at	SPAG4	mRNA	1.95e-11	1.48e-12	1.01
222890_at	CCDC113	mRNA	4.06e-11	3.23e-12	1.01
213894_at	THSD7A	mRNA	8.14e-10	7.92e-11	1.01
204970_s_at	MAFG	mRNA	1.56e-28	7.52e-31	1.02
203830_at	C17orf75	mRNA	1.31e-27	7.4e-30	1.02
218910_at	ANO10	mRNA	6.07e-24	6.51e-26	1.02
220486_x_at	TMEM164	mRNA	9.86e-23	1.32e-24	1.02
1553993_s_at	MED25	mRNA	3.9e-22	5.83e-24	1.02
224753_at	CDCA5	mRNA	6.09e-21	1.11e-22	1.02
236852_at	FBXO43	mRNA	1.84e-12	1.19e-13	1.02
227717_at	ARHGEF37	mRNA	1.96e-12	1.27e-13	1.02
201471_s_at	SQSTM1	mRNA	4.4e-11	3.52e-12	1.02
205137_x_at	USH1C	mRNA	8.1e-11	6.76e-12	1.02
209044_x_at	SF3B4	mRNA	7.63e-33	1.63e-35	1.03
224707_at	CYSTM1	mRNA	1.79e-22	2.54e-24	1.03
1552619_a_at	ANLN	mRNA	4.94e-22	7.55e-24	1.03
205937_at	CGREF1	mRNA	5.18e-20	1.07e-21	1.03
212922_s_at	SMYD2	mRNA	4.86e-19	1.17e-20	1.03
215071_s_at	HIST1H2AC	mRNA	3.21e-16	1.19e-17	1.03
219105_x_at	ORC6	mRNA	8.33e-15	3.74e-16	1.03
201577_at	NME1	mRNA	3.84e-11	3.03e-12	1.03
207493_x_at	SSX2	mRNA	4.78e-11	3.85e-12	1.03
212850_s_at	LRP4	mRNA	2.65e-10	2.39e-11	1.03
221823_at	C5orf30	mRNA	3.08e-10	2.82e-11	1.03
1552761_at	SLC16A11	mRNA	1.67e-08	2.01e-09	1.03
227318_at	TMEM178B	mRNA	9.14e-07	1.48e-07	1.03
215432_at	ACSM1	mRNA	0.000105	2.49e-05	1.03
205046_at	CENPE	mRNA	5.99e-24	6.4e-26	1.04
226129_at	FAM83H	mRNA	3.92e-22	5.86e-24	1.04
226851_at	LYPLAL1	mRNA	6.65e-21	1.22e-22	1.04
201765_s_at	HEXA	mRNA	5.87e-15	2.6e-16	1.04
205185_at	SPINK5	mRNA	2.37e-14	1.14e-15	1.04
1569843_at	DYNC1I1	mRNA	1.43e-12	9.05e-14	1.04
219502_at	NEIL3	mRNA	2.54e-11	1.96e-12	1.04
204688_at	SGCE	mRNA	4.8e-09	5.27e-10	1.04
221210_s_at	NPL	mRNA	1.82e-08	2.2e-09	1.04
219987_at	ERVMER34-1	mRNA	8.92e-08	1.22e-08	1.04
231307_at	PAGE2	mRNA	4.5e-06	8.28e-07	1.04
209934_s_at	ATP2C1	mRNA	4.38e-25	3.73e-27	1.05
223229_at	UBE2T	mRNA	5.06e-18	1.41e-19	1.05
207528_s_at	SLC7A11	mRNA	1.13e-13	5.98e-15	1.05
230644_at	LRFN5	mRNA	2.39e-05	4.99e-06	1.05
203429_s_at	SUCO	mRNA	4.19e-22	6.3e-24	1.06
221572_s_at	SLC26A6	mRNA	6.86e-19	1.69e-20	1.06
1560433_at	CLTA	mRNA	3.78e-16	1.42e-17	1.06
204788_s_at	PPOX	mRNA	2.91e-28	1.48e-30	1.07
201956_s_at	GNPAT	mRNA	3.1e-26	2.22e-28	1.07
218622_at	NUP37	mRNA	1.28e-14	5.94e-16	1.07
203774_at	MTR	mRNA	3.71e-11	2.93e-12	1.07
219928_s_at	CABYR	mRNA	3.59e-09	3.86e-10	1.07
209421_at	MSH2	mRNA	7.21e-09	8.16e-10	1.07
219926_at	POPDC3	mRNA	2.17e-08	2.66e-09	1.07
206937_at	SPTA1	mRNA	5.79e-08	7.64e-09	1.07
201088_at	KPNA2	mRNA	1.48e-21	2.43e-23	1.08
218698_at	APIP	mRNA	8.32e-21	1.54e-22	1.08
207426_s_at	TNFSF4	mRNA	1.11e-18	2.79e-20	1.08
219510_at	POLQ	mRNA	2.42e-18	6.4e-20	1.08
224521_s_at	CCDC77	mRNA	7.13e-18	2.03e-19	1.08
207180_s_at	HTATIP2	mRNA	1.98e-12	1.28e-13	1.08
209822_s_at	VLDLR	mRNA	1.25e-07	1.75e-08	1.08
211980_at	COL4A1	mRNA	1.27e-07	1.77e-08	1.08
201667_at	GJA1	mRNA	0.000888	0.000257	1.08
222581_at	XPR1	mRNA	2.09e-20	4.09e-22	1.09
202326_at	EHMT2	mRNA	5.27e-20	1.09e-21	1.09
212155_at	RNF187	mRNA	1.83e-19	4.1e-21	1.09
219773_at	NOX4	mRNA	3.88e-19	9.17e-21	1.09
219387_at	CCDC88A	mRNA	3.78e-18	1.03e-19	1.09
205559_s_at	PCSK5	mRNA	3.61e-07	5.46e-08	1.09
202786_at	STK39	mRNA	3.69e-06	6.69e-07	1.09
205656_at	PCDH17	mRNA	5.37e-20	1.11e-21	1.1
213610_s_at	KLHL23	mRNA	9.35e-19	2.35e-20	1.1
213599_at	OIP5	mRNA	6.15e-17	2.02e-18	1.1
201774_s_at	NCAPD2	mRNA	2.12e-16	7.58e-18	1.1
205097_at	SLC26A2	mRNA	1.33e-11	9.8e-13	1.1
227646_at	EBF1	mRNA	2.96e-09	3.15e-10	1.1
209424_s_at	AMACR	mRNA	1.12e-07	1.55e-08	1.1
229349_at	LIN28B	mRNA	5.49e-05	1.23e-05	1.1
205167_s_at	CDC25C	mRNA	1.71e-26	1.17e-28	1.11
205107_s_at	EFNA4	mRNA	3.25e-22	4.8e-24	1.11
218741_at	CENPM	mRNA	3.07e-19	7.14e-21	1.11
201463_s_at	TALDO1	mRNA	3.53e-19	8.27e-21	1.11
201930_at	MCM6	mRNA	1.19e-16	4.06e-18	1.11
213679_at	TTC30A	mRNA	9.2e-16	3.64e-17	1.11
1555486_a_at	PRR5L	mRNA	2.49e-15	1.05e-16	1.11
1557227_s_at	TPR	mRNA	7.33e-12	5.17e-13	1.11
213262_at	SACS	mRNA	1.99e-10	1.77e-11	1.11
209406_at	BAG2	mRNA	7.43e-08	9.99e-09	1.11
205406_s_at	SPA17	mRNA	6.1e-24	6.58e-26	1.12
219687_at	HHAT	mRNA	3.39e-22	5.04e-24	1.12
202647_s_at	NRAS	mRNA	6.44e-18	1.82e-19	1.12
235496_at	HRCT1	mRNA	8.5e-18	2.47e-19	1.12
204247_s_at	CDK5	mRNA	2.4e-14	1.16e-15	1.12
236430_at	TMED6	mRNA	7.75e-08	1.05e-08	1.12
203073_at	COG2	mRNA	1.7e-33	3.26e-36	1.13
1555758_a_at	CDKN3	mRNA	1.04e-20	1.95e-22	1.13
1552921_a_at	FIGNL1	mRNA	2.59e-20	5.13e-22	1.13
1558501_at	DNM3	mRNA	7.86e-18	2.26e-19	1.13
206355_at	GNAL	mRNA	4.39e-13	2.58e-14	1.13
210353_s_at	SLC6A2	mRNA	3.77e-12	2.56e-13	1.13
219494_at	RAD54B	mRNA	1.11e-11	8.06e-13	1.13
205854_at	TULP3	mRNA	7.9e-25	7.08e-27	1.14
235720_at	CRIP3	mRNA	5.14e-19	1.24e-20	1.14
208864_s_at	TXN	mRNA	7.91e-18	2.28e-19	1.14
204558_at	RAD54L	mRNA	2.9e-13	1.66e-14	1.14
226962_at	ZBTB41	mRNA	1.48e-11	1.1e-12	1.14
219477_s_at	THSD1	mRNA	6.07e-11	4.96e-12	1.14
204351_at	S100P	mRNA	7.41e-06	1.41e-06	1.14
203714_s_at	TBCE	mRNA	4.82e-29	2.08e-31	1.15
202275_at	G6PD	mRNA	5.89e-13	3.53e-14	1.15
206346_at	PRLR	mRNA	1.41e-12	8.94e-14	1.15
212913_at	SAPCD1	mRNA	4.27e-09	4.66e-10	1.15
205990_s_at	WNT5A	mRNA	6.6e-07	1.04e-07	1.15
206698_at	XK	mRNA	1.86e-06	3.19e-07	1.15
209836_x_at	BOLA2	mRNA	2.12e-28	1.05e-30	1.16
244334_at	TRAM1L1	mRNA	1.09e-17	3.2e-19	1.16
205053_at	PRIM1	mRNA	7.15e-15	3.19e-16	1.16
203304_at	BAMBI	mRNA	1.13e-13	6.02e-15	1.16
214774_x_at	TOX3	mRNA	1.37e-12	8.65e-14	1.16
226980_at	DEPDC1B	mRNA	4.94e-11	3.98e-12	1.16
219425_at	SULT4A1	mRNA	1.19e-10	1.02e-11	1.16
223580_at	SPSB2	mRNA	1.14e-24	1.05e-26	1.17
202321_at	GGPS1	mRNA	9.14e-24	1.02e-25	1.17
200770_s_at	LAMC1	mRNA	2.93e-15	1.24e-16	1.17
218726_at	HJURP	mRNA	1.52e-23	1.76e-25	1.18
1556126_s_at	GPATCH2	mRNA	1.87e-19	4.19e-21	1.18
219958_at	TMEM74B	mRNA	8.39e-17	2.8e-18	1.18
213568_at	OSR2	mRNA	7.06e-16	2.75e-17	1.18
227801_at	TRIM59	mRNA	4.13e-14	2.06e-15	1.18
201578_at	PODXL	mRNA	2.94e-13	1.68e-14	1.18
230238_at	SOWAHA	mRNA	1.63e-11	1.22e-12	1.18
228946_at	INTU	mRNA	2.2e-11	1.68e-12	1.18
206364_at	KIF14	mRNA	2.84e-24	2.83e-26	1.19
209891_at	SPC25	mRNA	1.45e-19	3.19e-21	1.19
209610_s_at	SLC1A4	mRNA	4.85e-17	1.56e-18	1.19
222020_s_at	NTM	mRNA	2.76e-10	2.5e-11	1.19
202107_s_at	MCM2	mRNA	2.08e-12	1.35e-13	1.2
209218_at	SQLE	mRNA	1.12e-05	2.2e-06	1.2
219000_s_at	DSCC1	mRNA	1.17e-19	2.53e-21	1.21
201555_at	MCM3	mRNA	1.55e-19	3.41e-21	1.21
1554588_a_at	TTC30B	mRNA	6.86e-18	1.95e-19	1.21
219117_s_at	FKBP11	mRNA	2.43e-17	7.44e-19	1.21
203560_at	GGH	mRNA	2.38e-15	9.94e-17	1.21
221729_at	COL5A2	mRNA	6.58e-12	4.61e-13	1.21
218908_at	ASPSCR1	mRNA	8.54e-12	6.09e-13	1.21
205372_at	PLAG1	mRNA	2.2e-11	1.68e-12	1.21
213482_at	DOCK3	mRNA	3.42e-08	4.35e-09	1.21
205539_at	AVIL	mRNA	6.42e-07	1.01e-07	1.21
225105_at	C12orf75	mRNA	9.07e-06	1.75e-06	1.21
202345_s_at	FABP5	mRNA	1.08e-05	2.12e-06	1.22
201579_at	FAT1	mRNA	2.28e-09	2.37e-10	1.23
200616_s_at	MLEC	mRNA	5.63e-22	8.67e-24	1.24
201841_s_at	HSPB1	mRNA	3.06e-08	3.86e-09	1.24
223274_at	TCF19	mRNA	2e-25	1.62e-27	1.25
227898_s_at	ZFP41	mRNA	1.04e-24	9.53e-27	1.25
205436_s_at	H2AFX	mRNA	4.36e-24	4.47e-26	1.25
201714_at	TUBG1	mRNA	8.9e-19	2.22e-20	1.25
218687_s_at	MUC13	mRNA	6.41e-08	8.52e-09	1.25
213587_s_at	ATP6V0E2	mRNA	3.41e-13	1.97e-14	1.27
226360_at	ZNRF3	mRNA	5.01e-10	4.72e-11	1.27
1553099_at	TIGD1	mRNA	3.92e-27	2.44e-29	1.28
203548_s_at	LPL	mRNA	8.79e-18	2.56e-19	1.28
204531_s_at	BRCA1	mRNA	7.04e-18	2e-19	1.29
218788_s_at	SMYD3	mRNA	9.97e-16	3.97e-17	1.29
1553672_at	ENAH	mRNA	1.97e-11	1.49e-12	1.29
205449_at	SAC3D1	mRNA	9.81e-31	3.14e-33	1.3
206857_s_at	FKBP1B	mRNA	1.02e-08	1.19e-09	1.3
204580_at	MMP12	mRNA	7.84e-07	1.26e-07	1.3
219923_at	TRIM45	mRNA	1.18e-29	4.69e-32	1.31
202813_at	TARBP1	mRNA	7.52e-24	8.23e-26	1.31
204767_s_at	FEN1	mRNA	2.42e-20	4.78e-22	1.31
203192_at	ABCB6	mRNA	1.94e-18	5.05e-20	1.31
219682_s_at	TBX3	mRNA	5.31e-05	1.19e-05	1.31
226059_at	TOMM40L	mRNA	5.02e-28	2.63e-30	1.32
226253_at	LRRC45	mRNA	2.62e-22	3.8e-24	1.32
219404_at	EPS8L3	mRNA	1.19e-13	6.38e-15	1.32
204023_at	RFC4	mRNA	4.08e-19	9.65e-21	1.33
206584_at	LY96	mRNA	2.94e-06	5.25e-07	1.33
201377_at	UBAP2L	mRNA	1.93e-27	1.14e-29	1.34
1556064_at	PPARA	mRNA	1.1e-25	8.69e-28	1.34
235520_at	ZNF280C	mRNA	3.47e-15	1.49e-16	1.34
206254_at	EGF	mRNA	8.88e-12	6.36e-13	1.34
219493_at	SHCBP1	mRNA	7.93e-20	1.67e-21	1.35
206897_at	PAGE1	mRNA	1.85e-06	3.18e-07	1.35
220167_s_at	TP53TG3	mRNA	1.23e-12	7.7e-14	1.36
219580_s_at	TMC5	mRNA	3.63e-07	5.48e-08	1.36
202831_at	GPX2	mRNA	8.8e-05	2.06e-05	1.36
201487_at	CTSC	mRNA	4.5e-18	1.24e-19	1.37
200882_s_at	PSMD4	mRNA	2.97e-29	1.22e-31	1.38
202954_at	UBE2C	mRNA	1.16e-28	5.39e-31	1.38
218610_s_at	CPPED1	mRNA	1.34e-27	7.62e-30	1.38
209093_s_at	GBA	mRNA	1.14e-23	1.31e-25	1.38
221523_s_at	RRAGD	mRNA	2.03e-10	1.8e-11	1.38
212909_at	LYPD1	mRNA	1.07e-09	1.06e-10	1.38
203240_at	FCGBP	mRNA	7.77e-08	1.05e-08	1.38
201764_at	TMEM106C	mRNA	1.41e-38	1.18e-41	1.39
220085_at	HELLS	mRNA	1.04e-15	4.14e-17	1.39
210015_s_at	MAP2	mRNA	4.14e-31	1.24e-33	1.4
225972_at	TMEM64	mRNA	3.81e-24	3.89e-26	1.4
213007_at	FANCI	mRNA	2.27e-19	5.18e-21	1.4
225638_at	COA6	mRNA	1.01e-31	2.71e-34	1.41
210052_s_at	TPX2	mRNA	9.17e-20	1.95e-21	1.41
204709_s_at	KIF23	mRNA	3.65e-16	1.37e-17	1.41
1552531_a_at	NLRP11	mRNA	4.45e-11	3.56e-12	1.41
235572_at	SPC24	mRNA	2.65e-27	1.61e-29	1.42
214830_at	SLC38A6	mRNA	1.83e-16	6.46e-18	1.42
219714_s_at	CACNA2D3	mRNA	3.31e-09	3.55e-10	1.42
206316_s_at	KNTC1	mRNA	1.84e-17	5.58e-19	1.43
220057_at	XAGE1A	mRNA	2.12e-12	1.38e-13	1.44
209752_at	REG1A	mRNA	2.01e-06	3.46e-07	1.44
224937_at	PTGFRN	mRNA	5.37e-20	1.11e-21	1.45
234464_s_at	EME1	mRNA	2.23e-16	8e-18	1.45
227711_at	GTSF1	mRNA	2.63e-07	3.88e-08	1.45
219306_at	KIF15	mRNA	1.5e-20	2.89e-22	1.46
204569_at	ICK	mRNA	2.05e-19	4.62e-21	1.46
1552745_at	SLCO6A1	mRNA	3.17e-16	1.17e-17	1.46
1552742_at	KCNH8	mRNA	3.16e-08	3.99e-09	1.46
224320_s_at	MCM8	mRNA	1.1e-29	4.31e-32	1.47
218542_at	CEP55	mRNA	1.07e-16	3.65e-18	1.47
206638_at	HTR2B	mRNA	5.23e-07	8.11e-08	1.47
207918_s_at	TSPY1	mRNA	1.82e-05	3.73e-06	1.47
222760_at	ZNF703	mRNA	4.4e-18	1.21e-19	1.48
205278_at	GAD1	mRNA	3.72e-12	2.52e-13	1.48
238066_at	RBP7	mRNA	1.33e-11	9.8e-13	1.48
213110_s_at	COL4A5	mRNA	2.26e-07	3.3e-08	1.48
208955_at	DUT	mRNA	6.32e-27	4.08e-29	1.49
212651_at	RHOBTB1	mRNA	1.04e-08	1.22e-09	1.49
200998_s_at	CKAP4	mRNA	2.76e-23	3.38e-25	1.5
210410_s_at	MSH5	mRNA	5.52e-21	9.97e-23	1.5
227775_at	CELF6	mRNA	4.36e-11	3.48e-12	1.5
225681_at	CTHRC1	mRNA	1.01e-05	1.98e-06	1.5
200872_at	S100A10	mRNA	4.34e-26	3.2e-28	1.51
207039_at	CDKN2A	mRNA	8.52e-26	6.64e-28	1.51
218796_at	FERMT1	mRNA	1.92e-21	3.18e-23	1.52
208699_x_at	TKT	mRNA	2.49e-13	1.41e-14	1.52
222039_at	KIF18B	mRNA	1.3e-27	7.28e-30	1.53
225655_at	UHRF1	mRNA	1.78e-16	6.26e-18	1.53
203861_s_at	ACTN2	mRNA	1.2e-11	8.77e-13	1.54
226623_at	PHYHIPL	mRNA	4.43e-19	1.05e-20	1.57
231310_at	TRIM71	mRNA	2.46e-18	6.52e-20	1.57
205476_at	CCL20	mRNA	1.66e-05	3.38e-06	1.57
202196_s_at	DKK3	mRNA	5.44e-11	4.42e-12	1.58
205830_at	CLGN	mRNA	1.28e-06	2.13e-07	1.58
209408_at	KIF2C	mRNA	7.64e-28	4.11e-30	1.59
220405_at	SNTG1	mRNA	2.98e-15	1.27e-16	1.59
204776_at	THBS4	mRNA	1.28e-14	5.9e-16	1.59
201681_s_at	DLG5	mRNA	3.45e-31	1.03e-33	1.6
220994_s_at	STXBP6	mRNA	4.44e-29	1.89e-31	1.6
205880_at	PRKD1	mRNA	4.41e-13	2.6e-14	1.6
203358_s_at	EZH2	mRNA	2.49e-26	1.73e-28	1.61
208394_x_at	ESM1	mRNA	4.03e-25	3.43e-27	1.61
231292_at	EID3	mRNA	5.57e-18	1.56e-19	1.61
205339_at	STIL	mRNA	1.84e-29	7.47e-32	1.62
228069_at	MTFR2	mRNA	2.61e-25	2.16e-27	1.63
218257_s_at	UGGT1	mRNA	5.84e-24	6.18e-26	1.64
220581_at	CCDC170	mRNA	1.77e-17	5.36e-19	1.64
228338_at	COLCA2	mRNA	6.11e-24	6.61e-26	1.65
220117_at	ZNF385D	mRNA	1.36e-14	6.31e-16	1.65
207469_s_at	PIR	mRNA	1.03e-21	1.65e-23	1.66
220100_at	SLC22A11	mRNA	3.7e-13	2.15e-14	1.67
1555225_at	C1orf43	mRNA	2e-30	6.88e-33	1.68
206632_s_at	APOBEC3A	mRNA	1.05e-23	1.19e-25	1.68
218704_at	RNF43	mRNA	5.44e-23	7.01e-25	1.68
206414_s_at	ASAP2	mRNA	5.23e-22	8.01e-24	1.69
201467_s_at	NQO1	mRNA	9.54e-08	1.31e-08	1.69
231867_at	TENM2	mRNA	2.45e-05	5.12e-06	1.69
225252_at	SRXN1	mRNA	3.8e-17	1.21e-18	1.7
204235_s_at	GULP1	mRNA	1.69e-11	1.27e-12	1.7
204033_at	TRIP13	mRNA	7.63e-27	4.98e-29	1.71
220840_s_at	C1orf112	mRNA	4.95e-26	3.69e-28	1.71
205034_at	CCNE2	mRNA	5.63e-24	5.93e-26	1.71
222906_at	FLVCR1	mRNA	6.25e-23	8.13e-25	1.71
205414_s_at	ARHGAP44	mRNA	1.02e-15	4.08e-17	1.71
203766_s_at	LMOD1	mRNA	8.45e-11	7.07e-12	1.71
211276_at	TCEAL2	mRNA	2.88e-05	6.1e-06	1.71
232336_at	ZSWIM5	mRNA	2.06e-30	7.13e-33	1.72
220283_at	HHIPL2	mRNA	2.5e-14	1.21e-15	1.72
205048_s_at	PSPH	mRNA	1.4e-07	1.96e-08	1.73
203554_x_at	PTTG1	mRNA	1.71e-28	8.25e-31	1.74
204092_s_at	AURKA	mRNA	2.72e-23	3.32e-25	1.74
204510_at	CDC7	mRNA	3.29e-20	6.61e-22	1.74
220245_at	SLC45A2	mRNA	1.07e-10	9.14e-12	1.74
226936_at	CENPW	mRNA	1.55e-38	1.33e-41	1.77
209642_at	BUB1	mRNA	2.81e-25	2.33e-27	1.77
205352_at	SERPINI1	mRNA	6.66e-20	1.4e-21	1.77
1555745_a_at	LYZ	mRNA	2.48e-09	2.61e-10	1.77
209576_at	GNAI1	mRNA	1e-24	9.12e-27	1.78
213172_at	TTC9	mRNA	1.09e-20	2.06e-22	1.78
201266_at	TXNRD1	mRNA	4.56e-20	9.31e-22	1.8
220988_s_at	C1QTNF3	mRNA	1.59e-15	6.5e-17	1.8
202580_x_at	FOXM1	mRNA	8.29e-27	5.46e-29	1.81
213954_at	FAM169A	mRNA	4.79e-13	2.84e-14	1.83
208307_at	RBMY1A1	mRNA	1.71e-22	2.41e-24	1.84
1553197_at	DCAF4L2	mRNA	8.57e-17	2.86e-18	1.84
203963_at	CA12	mRNA	2.75e-11	2.13e-12	1.85
205741_s_at	DTNA	mRNA	4.27e-18	1.18e-19	1.86
205542_at	STEAP1	mRNA	1.08e-19	2.33e-21	1.87
206609_at	MAGEC1	mRNA	1.2e-12	7.51e-14	1.87
209160_at	AKR1C3	mRNA	8.7e-33	1.92e-35	1.89
204026_s_at	ZWINT	mRNA	4.09e-23	5.12e-25	1.89
231786_at	HOXA13	mRNA	3.57e-22	5.33e-24	1.89
229964_at	C9orf152	mRNA	5.43e-19	1.32e-20	1.89
210652_s_at	TTC39A	mRNA	5.19e-16	1.99e-17	1.9
219990_at	E2F8	mRNA	1.28e-27	7.15e-30	1.91
204962_s_at	CENPA	mRNA	2.21e-27	1.33e-29	1.91
207666_x_at	SSX3	mRNA	9.84e-20	2.11e-21	1.91
220510_at	RHBG	mRNA	4.62e-11	3.71e-12	1.91
222848_at	CENPK	mRNA	6.38e-26	4.85e-28	1.93
219508_at	GCNT3	mRNA	2.43e-14	1.17e-15	1.94
210609_s_at	TP53I3	mRNA	1.44e-20	2.76e-22	1.95
229380_at	ILDR2	mRNA	3.16e-19	7.35e-21	1.97
228206_at	HS3ST4	mRNA	3.81e-10	3.53e-11	1.97
218355_at	KIF4A	mRNA	7.43e-32	1.89e-34	1.98
220062_s_at	MAGEC2	mRNA	1.32e-15	5.34e-17	1.98
204146_at	RAD51AP1	mRNA	5.82e-27	3.74e-29	1.99
203477_at	COL15A1	mRNA	3.53e-16	1.32e-17	2.01
200795_at	SPARCL1	mRNA	3.12e-10	2.86e-11	2.01
205637_s_at	SH3GL3	mRNA	1.33e-09	1.33e-10	2.01
201656_at	ITGA6	mRNA	9.26e-34	1.73e-36	2.02
223870_at	FBXW10	mRNA	2.41e-22	3.49e-24	2.02
206373_at	ZIC1	mRNA	3.7e-13	2.15e-14	2.02
218039_at	NUSAP1	mRNA	5.43e-29	2.38e-31	2.03
202705_at	CCNB2	mRNA	7.42e-31	2.33e-33	2.04
204159_at	CDKN2C	mRNA	1.42e-25	1.12e-27	2.05
205054_at	NEB	mRNA	2.9e-22	4.24e-24	2.07
217202_s_at	SBF2	mRNA	6.82e-12	4.78e-13	2.07
218883_s_at	CENPU	mRNA	2.08e-26	1.44e-28	2.08
204641_at	NEK2	mRNA	1.41e-30	4.68e-33	2.1
211207_s_at	ACSL6	mRNA	1.15e-16	3.91e-18	2.1
204444_at	KIF11	mRNA	6.38e-28	3.41e-30	2.11
220133_at	ODAM	mRNA	9.41e-16	3.73e-17	2.13
225871_at	STEAP2	mRNA	2.17e-33	4.25e-36	2.17
235845_at	SP5	mRNA	2.09e-21	3.49e-23	2.19
204136_at	COL7A1	mRNA	1.48e-16	5.13e-18	2.2
204720_s_at	DNAJC6	mRNA	4.57e-34	7.95e-37	2.22
202422_s_at	ACSL4	mRNA	4.36e-13	2.57e-14	2.22
227238_at	MUC15	mRNA	9.09e-13	5.61e-14	2.22
203764_at	DLGAP5	mRNA	1.3e-27	7.3e-30	2.23
205862_at	GREB1	mRNA	8.85e-12	6.34e-13	2.24
205564_at	PAGE4	mRNA	2.68e-10	2.42e-11	2.24
206102_at	GINS1	mRNA	2.44e-30	8.6e-33	2.26
204822_at	TTK	mRNA	1.62e-27	9.41e-30	2.31
202870_s_at	CDC20	mRNA	1.38e-26	9.24e-29	2.32
218662_s_at	NCAPG	mRNA	9.9e-33	2.21e-35	2.37
205896_at	SLC22A4	mRNA	9.71e-20	2.08e-21	2.37
210467_x_at	MAGEA12	mRNA	2.09e-13	1.16e-14	2.37
228033_at	E2F7	mRNA	5.84e-34	1.03e-36	2.39
223381_at	NUF2	mRNA	9.02e-30	3.45e-32	2.39
205890_s_at	UBD	mRNA	1.79e-16	6.32e-18	2.39
219787_s_at	ECT2	mRNA	1.11e-24	1.02e-26	2.4
209890_at	TSPAN5	mRNA	2.14e-16	7.66e-18	2.41
218585_s_at	DTL	mRNA	6.77e-27	4.4e-29	2.42
201890_at	RRM2	mRNA	5.12e-29	2.23e-31	2.44
218755_at	KIF20A	mRNA	1.83e-34	2.95e-37	2.46
218009_s_at	PRC1	mRNA	2.22e-31	6.37e-34	2.49
229656_s_at	EML6	mRNA	1.93e-23	2.29e-25	2.49
225687_at	FAM83D	mRNA	2.55e-36	2.94e-39	2.52
232195_at	GPR158	mRNA	5.26e-32	1.3e-34	2.52
220205_at	TPTE	mRNA	4.3e-13	2.53e-14	2.53
232707_at	ISX	mRNA	9.1e-23	1.22e-24	2.54
206286_s_at	TDGF1	mRNA	6.86e-18	1.95e-19	2.54
225834_at	FAM72A	mRNA	1.85e-28	8.96e-31	2.55
1563591_at	RUNX1	mRNA	6.01e-18	1.69e-19	2.55
229638_at	IRX3	mRNA	1.45e-21	2.37e-23	2.57
214710_s_at	CCNB1	mRNA	2.09e-36	2.33e-39	2.58
226545_at	CD109	mRNA	6.5e-26	4.95e-28	2.59
222077_s_at	RACGAP1	mRNA	3.68e-40	2.63e-43	2.62
219148_at	PBK	mRNA	4.4e-34	7.57e-37	2.63
203755_at	BUB1B	mRNA	6.62e-33	1.39e-35	2.66
231131_at	FAM133A	mRNA	2.67e-29	1.09e-31	2.66
207325_x_at	MAGEA1	mRNA	6.77e-19	1.66e-20	2.66
205623_at	ALDH3A1	mRNA	1.27e-12	7.97e-14	2.66
231265_at	COX7B2	mRNA	2.22e-21	3.73e-23	2.68
203213_at	CDK1	mRNA	3.1e-36	3.68e-39	2.7
227226_at	MRAP2	mRNA	5.93e-30	2.22e-32	2.74
200648_s_at	GLUL	mRNA	3.65e-17	1.16e-18	2.77
205110_s_at	FGF13	mRNA	2.74e-18	7.31e-20	2.78
207086_x_at	GAGE13	mRNA	6.47e-11	5.31e-12	2.79
212551_at	CAP2	mRNA	3.94e-41	2.09e-44	2.84
204825_at	MELK	mRNA	4.53e-36	5.8e-39	2.84
204162_at	NDC80	mRNA	1.01e-37	9.59e-41	2.85
238732_at	COL24A1	mRNA	6.7e-25	5.84e-27	2.88
232010_at	FSTL5	mRNA	1.18e-16	4.01e-18	2.88
219772_s_at	SMPX	mRNA	4.19e-31	1.26e-33	2.9
237273_at	KCNU1	mRNA	7.97e-12	5.66e-13	2.91
209942_x_at	MAGEA3	mRNA	3.6e-15	1.55e-16	2.94
235004_at	RBM24	mRNA	2.87e-37	2.99e-40	2.99
209875_s_at	SPP1	mRNA	2.18e-13	1.21e-14	3.04
206640_x_at	GAGE1	mRNA	2.29e-11	1.76e-12	3.04
1553211_at	ANKFN1	mRNA	1.48e-13	8.01e-15	3.05
219918_s_at	ASPM	mRNA	7.54e-41	4.28e-44	3.06
212531_at	LCN2	mRNA	1.65e-22	2.32e-24	3.08
206626_x_at	SSX1	mRNA	8.51e-19	2.12e-20	3.09
205373_at	CTNNA2	mRNA	3.65e-17	1.16e-18	3.11
207165_at	HMMR	mRNA	2.57e-49	2.35e-53	3.22
223642_at	ZIC2	mRNA	3.53e-30	1.3e-32	3.22
213194_at	ROBO1	mRNA	2.26e-34	3.71e-37	3.23
207739_s_at	GAGE10	mRNA	3.6e-11	2.84e-12	3.25
209220_at	GPC3	mRNA	6.36e-23	8.29e-25	3.35
205342_s_at	SULT1C2	mRNA	4.44e-40	3.25e-43	3.47
206561_s_at	AKR1B10	mRNA	5.79e-12	4.02e-13	3.5
204105_s_at	NRCAM	mRNA	2.54e-25	2.09e-27	3.68
204602_at	DKK1	mRNA	5.57e-19	1.35e-20	3.7
201291_s_at	TOP2A	mRNA	5.84e-43	2.03e-46	3.74
206239_s_at	SPINK1	mRNA	3.67e-16	1.38e-17	3.81
205815_at	REG3A	mRNA	2e-14	9.49e-16	5.31
FDR, false discovery rate; FC, fold change; lncRNA, long non-coding RNA.

## Sheet: GSE121248-DERs
Table SIB. Identification of 666 differentially expressed RNAs in GSE121248.
ID	Symbol	Type	FDR	P-value	logFC
1559573_at	LINC01093	lncRNA	2.23e-21	1.23e-24	-4.17843
230577_at	LINC00844	lncRNA	7.06e-06	8.82e-07	-2.34971
224646_x_at	H19	lncRNA	4.44e-08	2.6e-09	-2.26705
219791_s_at	HAND2-AS1	lncRNA	1.15e-16	2.04e-19	-1.44566
1564139_at	A2M-AS1	lncRNA	9.89e-11	2.08e-12	-1.42248
232090_at	DNM3OS	lncRNA	7.45e-06	9.37e-07	-1.39728
227446_s_at	DHRS4-AS1	lncRNA	1.84e-07	1.34e-08	-1.39257
227554_at	MAGI2-AS3	lncRNA	2.36e-09	8.51e-11	-1.39166
228004_at	LINC00261	lncRNA	3.1e-05	4.76e-06	-1.3827
238113_at	SMIM2-AS1	lncRNA	3.07e-05	4.71e-06	-1.27264
1559033_at	LINC01018	lncRNA	0.00514	0.00176	-1.2671
1559315_s_at	SOCS2-AS1	lncRNA	2.91e-09	1.09e-10	-1.22705
230488_s_at	DBH-AS1	lncRNA	0.000451	0.000104	-1.19628
239162_at	DAPK1-IT1	lncRNA	1.94e-05	2.79e-06	-1.19554
226587_at	PWAR6	lncRNA	0.00709	0.00256	-1.18083
1559363_at	LINC01146	lncRNA	2.44e-07	1.85e-08	-1.12422
236632_at	HHIP-AS1	lncRNA	8.11e-14	4.77e-16	-1.10293
207063_at	TTTY14	lncRNA	0.005	0.00171	-1.0933
1557055_s_at	LINC01128	lncRNA	7.83e-08	4.96e-09	-1.06336
240441_at	FAM99A	lncRNA	1.33e-12	1.32e-14	-1.04952
214696_at	MIR22HG	lncRNA	9.3e-10	2.84e-11	-1.04367
1556364_at	ADAMTS9-AS2	lncRNA	4.93e-06	5.83e-07	-1.03429
235126_at	FLVCR1-AS1	lncRNA	0.000194	3.95e-05	1.00935
206685_at	HCG4	lncRNA	0.000197	4.01e-05	1.01589
223773_s_at	SNHG12	lncRNA	2.92e-05	4.45e-06	1.0207
239764_at	ITPR1-AS1	lncRNA	1.28e-05	1.74e-06	1.02071
235217_at	LINC01004	lncRNA	0.000339	7.52e-05	1.03216
212337_at	TUG1	lncRNA	1.6e-09	5.42e-11	1.04635
231233_at	PCAT6	lncRNA	5.3e-07	4.48e-08	1.05263
1552862_at	RUSC1-AS1	lncRNA	1.05e-11	1.46e-13	1.05438
241224_x_at	DSCR8	lncRNA	0.0181	0.0076	1.08205
206082_at	HCP5	lncRNA	0.000548	0.000131	1.09725
1556072_at	LINC00528	lncRNA	3.67e-09	1.44e-10	1.15914
225547_at	SNHG6	lncRNA	1.81e-06	1.83e-07	1.1702
1553145_at	TAPT1-AS1	lncRNA	1.22e-06	1.17e-07	1.17031
237365_at	ELOVL2-AS1	lncRNA	0.000245	5.17e-05	1.1995
226995_at	LINC00205	lncRNA	1.53e-09	5.1e-11	1.20629
224610_at	SNHG1	lncRNA	4.41e-08	2.58e-09	1.23705
240574_at	DNAJC3-AS1	lncRNA	2.66e-07	2.03e-08	1.28826
224741_x_at	GAS5	lncRNA	4.23e-08	2.45e-09	1.32072
235174_s_at	LINC01003	lncRNA	1.3e-07	8.92e-09	1.32414
1558404_at	LINC00622	lncRNA	9.3e-07	8.52e-08	1.32884
229090_at	ZEB1-AS1	lncRNA	9.75e-12	1.34e-13	1.34449
242350_s_at	ST8SIA6-AS1	lncRNA	1.57e-08	7.8e-10	1.6188
220491_at	HAMP	mRNA	3.03e-15	9.46e-18	-4.16027
220116_at	KCNN2	mRNA	4.13e-24	9.06e-28	-3.99084
218002_s_at	CXCL14	mRNA	4.97e-26	6.62e-30	-3.80394
223699_at	CNDP1	mRNA	1.25e-19	1.05e-22	-3.75233
207804_s_at	FCN2	mRNA	6.81e-23	1.99e-26	-3.63646
207608_x_at	CYP1A2	mRNA	1.13e-16	1.97e-19	-3.35312
205866_at	FCN3	mRNA	4.21e-20	3.23e-23	-3.34198
1568638_a_at	IDO2	mRNA	1e-18	1.16e-21	-3.32168
205363_at	BBOX1	mRNA	3.67e-13	2.94e-15	-3.29662
230478_at	OIT3	mRNA	4.44e-23	1.14e-26	-3.22952
1559065_a_at	CLEC4G	mRNA	1.55e-22	5.94e-26	-3.16217
220496_at	CLEC1B	mRNA	4.97e-26	7.27e-30	-3.13588
229777_at	CLRN3	mRNA	4.79e-14	2.55e-16	-3.12481
205984_at	CRHBP	mRNA	2.16e-21	1.14e-24	-2.99937
237350_at	TTC36	mRNA	2.02e-17	3.11e-20	-2.95772
206354_at	SLCO1B3	mRNA	1.39e-08	6.77e-10	-2.92722
207995_s_at	CLEC4M	mRNA	2.51e-24	5.06e-28	-2.927
202992_at	C7	mRNA	3.52e-11	6.13e-13	-2.88151
217546_at	MT1M	mRNA	9.94e-09	4.61e-10	-2.83498
207027_at	HGFAC	mRNA	1.54e-15	4.12e-18	-2.82725
204955_at	SRPX	mRNA	1.13e-15	2.82e-18	-2.80819
206727_at	C9	mRNA	1.47e-06	1.45e-07	-2.78642
206424_at	CYP26A1	mRNA	1.9e-21	9.73e-25	-2.72121
209960_at	HGF	mRNA	7.89e-15	2.97e-17	-2.71091
207262_at	APOF	mRNA	4.12e-12	4.97e-14	-2.68501
202409_at	IGF2	mRNA	9.52e-07	8.77e-08	-2.68301
209469_at	GPM6A	mRNA	1.63e-18	2e-21	-2.68092
220801_s_at	HAO2	mRNA	1.39e-10	3.08e-12	-2.62003
207102_at	AKR1D1	mRNA	7.38e-08	4.66e-09	-2.55776
207201_s_at	SLC22A1	mRNA	4.24e-08	2.46e-09	-2.52915
204428_s_at	LCAT	mRNA	9.9e-20	7.97e-23	-2.51929
201893_x_at	DCN	mRNA	5.1e-10	1.39e-11	-2.51224
206797_at	NAT2	mRNA	7.44e-15	2.78e-17	-2.48134
220186_s_at	CDHR2	mRNA	1.4e-24	2.57e-28	-2.44651
202768_at	FOSB	mRNA	6.13e-13	5.31e-15	-2.42948
229831_at	CNTN3	mRNA	1.43e-07	9.96e-09	-2.41603
230964_at	FREM2	mRNA	5.58e-10	1.55e-11	-2.36908
207584_at	LPA	mRNA	2.03e-12	2.15e-14	-2.36806
209540_at	IGF1	mRNA	2.46e-11	4.03e-13	-2.34875
232449_at	BCO2	mRNA	4.06e-13	3.31e-15	-2.33306
1494_f_at	CYP2A6	mRNA	7.49e-08	4.73e-09	-2.32207
225316_at	MFSD2A	mRNA	6.84e-12	8.99e-14	-2.3163
219954_s_at	GBA3	mRNA	2.84e-10	7.08e-12	-2.30908
214621_at	GYS2	mRNA	3.43e-07	2.73e-08	-2.29107
205498_at	GHR	mRNA	1.48e-09	4.91e-11	-2.28211
205433_at	BCHE	mRNA	1.72e-07	1.23e-08	-2.27529
205225_at	ESR1	mRNA	1.04e-12	9.95e-15	-2.27525
229125_at	KANK4	mRNA	1.88e-14	8.89e-17	-2.23079
201693_s_at	EGR1	mRNA	1.26e-13	7.86e-16	-2.2255
206754_s_at	CYP2B6	mRNA	9.99e-08	6.59e-09	-2.19955
203666_at	CXCL12	mRNA	2.27e-16	4.49e-19	-2.19732
221848_at	ZGPAT	mRNA	2.27e-22	9.97e-26	-2.19542
209189_at	FOS	mRNA	4.22e-12	5.11e-14	-2.19192
204704_s_at	ALDOB	mRNA	8.32e-07	7.49e-08	-2.18759
237765_at	SLC25A47	mRNA	1.17e-15	2.95e-18	-2.17993
204483_at	ENO3	mRNA	4.64e-15	1.59e-17	-2.17973
242817_at	PGLYRP2	mRNA	1.58e-09	5.33e-11	-2.162
214142_at	ZG16	mRNA	1.81e-14	8.44e-17	-2.12075
205306_x_at	KMO	mRNA	1.06e-12	1.03e-14	-2.09442
210095_s_at	IGFBP3	mRNA	1.61e-16	3.01e-19	-2.07559
219014_at	PLAC8	mRNA	1.17e-17	1.72e-20	-2.06506
206680_at	CD5L	mRNA	2.64e-14	1.3e-16	-2.05476
215712_s_at	IGFALS	mRNA	1.05e-26	5.75e-31	-2.04757
206385_s_at	ANK3	mRNA	1.19e-09	3.81e-11	-2.02851
210524_x_at	MT1F	mRNA	7.58e-11	1.53e-12	-2.0242
206938_at	SRD5A2	mRNA	1.84e-14	8.64e-17	-2.01526
201744_s_at	LUM	mRNA	0.000219	4.53e-05	-1.99215
218162_at	OLFML3	mRNA	3.03e-15	9.42e-18	-1.98196
207256_at	MBL2	mRNA	1.48e-06	1.46e-07	-1.95411
206753_at	RDH16	mRNA	4.39e-08	2.56e-09	-1.94733
210889_s_at	FCGR2B	mRNA	1.38e-11	2.02e-13	-1.94173
202237_at	NNMT	mRNA	2.08e-08	1.08e-09	-1.93458
228186_s_at	RSPO3	mRNA	6.29e-19	6.67e-22	-1.93025
206030_at	ASPA	mRNA	8.38e-13	7.65e-15	-1.92275
204745_x_at	MT1G	mRNA	5.63e-10	1.57e-11	-1.92144
232428_at	MOGAT2	mRNA	2.88e-12	3.28e-14	-1.91487
206210_s_at	CETP	mRNA	1.22e-15	3.16e-18	-1.90855
206643_at	HAL	mRNA	4.39e-05	7.11e-06	-1.9026
219934_s_at	SULT1E1	mRNA	6.07e-10	1.72e-11	-1.89913
211489_at	ADRA1A	mRNA	1.49e-11	2.2e-13	-1.87677
220070_at	KDM8	mRNA	5.37e-21	3.63e-24	-1.87659
206172_at	IL13RA2	mRNA	5.41e-10	1.49e-11	-1.87582
208937_s_at	ID1	mRNA	8e-12	1.08e-13	-1.8647
223781_x_at	ADH4	mRNA	8.11e-09	3.66e-10	-1.86044
219737_s_at	PCDH9	mRNA	5.75e-13	4.96e-15	-1.85631
215506_s_at	DIRAS3	mRNA	1.5e-13	9.76e-16	-1.856
204998_s_at	ATF5	mRNA	1.61e-09	5.46e-11	-1.8471
206840_at	AFM	mRNA	4.29e-07	3.53e-08	-1.84522
205860_x_at	FOLH1	mRNA	2.24e-11	3.63e-13	-1.83704
212724_at	RND3	mRNA	4.41e-15	1.46e-17	-1.8326
205799_s_at	SLC3A1	mRNA	1.07e-09	3.37e-11	-1.83085
209696_at	FBP1	mRNA	8.04e-10	2.4e-11	-1.80897
229641_at	CCBE1	mRNA	5.64e-19	5.68e-22	-1.80073
207409_at	LECT2	mRNA	4.58e-06	5.35e-07	-1.79137
204301_at	KBTBD11	mRNA	3.96e-12	4.76e-14	-1.78973
209531_at	GSTZ1	mRNA	4.73e-14	2.5e-16	-1.77737
207202_s_at	NR1I2	mRNA	5.7e-09	2.41e-10	-1.77736
203571_s_at	ADIRF	mRNA	3.59e-11	6.28e-13	-1.77432
229331_at	SPATA18	mRNA	1.16e-11	1.63e-13	-1.77181
1558549_s_at	VNN1	mRNA	1.26e-07	8.59e-09	-1.77036
210143_at	ANXA10	mRNA	1.3e-08	6.29e-10	-1.76295
206007_at	PRG4	mRNA	3.02e-07	2.35e-08	-1.75956
204438_at	MRC1	mRNA	1.79e-10	4.17e-12	-1.75674
214421_x_at	CYP2C9	mRNA	2.23e-07	1.66e-08	-1.75438
205440_s_at	NPY1R	mRNA	2.05e-14	9.82e-17	-1.74887
239093_at	HOGA1	mRNA	1.61e-11	2.4e-13	-1.74538
220106_at	NPC1L1	mRNA	1.75e-11	2.63e-13	-1.7445
216058_s_at	CYP2C19	mRNA	6.46e-11	1.26e-12	-1.72843
205234_at	SLC16A4	mRNA	1.41e-09	4.61e-11	-1.72294
205384_at	FXYD1	mRNA	2.21e-10	5.28e-12	-1.71463
1569203_at	CXCL2	mRNA	5.5e-12	6.94e-14	-1.71411
206024_at	HPD	mRNA	0.000969	0.000253	-1.70654
214478_at	SPP2	mRNA	3.46e-06	3.88e-07	-1.70587
223593_at	AADAT	mRNA	4.26e-14	2.17e-16	-1.70342
220114_s_at	STAB2	mRNA	9.24e-22	4.56e-25	-1.70222
220794_at	GREM2	mRNA	3.89e-09	1.55e-10	-1.69437
205819_at	MARCO	mRNA	6.84e-14	3.9e-16	-1.68927
201599_at	OAT	mRNA	3.81e-08	2.17e-09	-1.68807
204304_s_at	PROM1	mRNA	3.24e-09	1.23e-10	-1.68085
206541_at	KLKB1	mRNA	3.7e-11	6.53e-13	-1.68059
207096_at	SAA4	mRNA	1.6e-06	1.59e-07	-1.67889
208147_s_at	CYP2C8	mRNA	0.000117	2.2e-05	-1.67796
205998_x_at	CYP3A4	mRNA	5.64e-11	1.08e-12	-1.67279
209365_s_at	ECM1	mRNA	4.97e-24	1.18e-27	-1.66555
206336_at	CXCL6	mRNA	0.0001	1.83e-05	-1.65851
227695_at	GLYATL1	mRNA	1.27e-11	1.83e-13	-1.65618
206461_x_at	MT1H	mRNA	4.7e-09	1.93e-10	-1.65083
238160_at	ACOT12	mRNA	1.52e-05	2.12e-06	-1.64846
208370_s_at	RCAN1	mRNA	3.96e-15	1.3e-17	-1.64623
223967_at	ANGPTL6	mRNA	1.82e-26	1.33e-30	-1.64605
205328_at	CLDN10	mRNA	1.04e-07	6.9e-09	-1.64395
1553583_a_at	THRSP	mRNA	2.4e-06	2.54e-07	-1.63371
219410_at	TMEM45A	mRNA	1.99e-08	1.02e-09	-1.63162
230438_at	TBX15	mRNA	7.9e-12	1.06e-13	-1.63075
203913_s_at	HPGD	mRNA	0.000487	0.000114	-1.62719
206380_s_at	CFP	mRNA	7.27e-18	9.97e-21	-1.62267
1431_at	CYP2E1	mRNA	0.0007	0.000173	-1.61203
213478_at	KAZN	mRNA	1.62e-14	7.41e-17	-1.59913
203434_s_at	MME	mRNA	0.000256	5.42e-05	-1.59163
210168_at	C6	mRNA	5.17e-06	6.16e-07	-1.58752
224724_at	SULF2	mRNA	1.66e-10	3.81e-12	-1.58563
1553977_a_at	CYP39A1	mRNA	2.07e-12	2.2e-14	-1.58247
208126_s_at	CYP2C18	mRNA	1.05e-07	6.96e-09	-1.5737
221008_s_at	ETNPPL	mRNA	8.76e-05	1.57e-05	-1.571
212859_x_at	MT1E	mRNA	2.62e-08	1.41e-09	-1.56705
219277_s_at	OGDHL	mRNA	9.47e-08	6.17e-09	-1.56628
206930_at	GLYAT	mRNA	3.51e-05	5.5e-06	-1.56236
216598_s_at	CCL2	mRNA	2.76e-07	2.12e-08	-1.55742
206140_at	LHX2	mRNA	1.58e-10	3.57e-12	-1.55411
207330_at	PZP	mRNA	2.64e-16	5.5e-19	-1.55353
210328_at	GNMT	mRNA	3.89e-05	6.2e-06	-1.55112
220148_at	ALDH8A1	mRNA	1.12e-06	1.06e-07	-1.55095
204224_s_at	GCH1	mRNA	3.81e-11	6.78e-13	-1.54715
205943_at	TDO2	mRNA	8.8e-07	7.99e-08	-1.54569
207874_s_at	CFHR3	mRNA	8.26e-05	1.47e-05	-1.53598
205942_s_at	ACSM3	mRNA	2.02e-11	3.17e-13	-1.53279
208034_s_at	PROZ	mRNA	3.52e-12	4.13e-14	-1.53033
207076_s_at	ASS1	mRNA	9.38e-15	3.77e-17	-1.52796
207218_at	F9	mRNA	0.000145	2.8e-05	-1.5253
205043_at	CFTR	mRNA	4.67e-07	3.88e-08	-1.52484
209291_at	ID4	mRNA	1.07e-06	1.01e-07	-1.52068
219059_s_at	LYVE1	mRNA	3.07e-15	9.65e-18	-1.52047
203372_s_at	SOCS2	mRNA	4.58e-08	2.7e-09	-1.52005
1555175_a_at	PBLD	mRNA	7.31e-12	9.69e-14	-1.51779
206305_s_at	C8A	mRNA	1.72e-07	1.23e-08	-1.50905
206068_s_at	ACADL	mRNA	3.34e-07	2.63e-08	-1.50903
1553635_s_at	TCTEX1D1	mRNA	9e-18	1.3e-20	-1.49881
230081_at	PLCXD3	mRNA	1.6e-08	7.97e-10	-1.49447
205541_s_at	GSPT2	mRNA	2.44e-07	1.85e-08	-1.494
204326_x_at	MT1X	mRNA	2.68e-07	2.05e-08	-1.48924
204018_x_at	HBA1	mRNA	1.6e-09	5.43e-11	-1.48902
201397_at	PHGDH	mRNA	2.06e-13	1.44e-15	-1.48881
218976_at	DNAJC12	mRNA	5.97e-06	7.28e-07	-1.48534
213874_at	SERPINA4	mRNA	6.16e-08	3.77e-09	-1.4835
215785_s_at	CYFIP2	mRNA	1.84e-09	6.37e-11	-1.47669
232494_at	CYP8B1	mRNA	0.000782	0.000197	-1.47559
207185_at	SLC10A1	mRNA	0.000287	6.23e-05	-1.47328
214180_at	MAN1C1	mRNA	1.99e-13	1.36e-15	-1.47297
218544_s_at	RCL1	mRNA	6.23e-12	7.96e-14	-1.46849
219562_at	RAB26	mRNA	1.4e-12	1.39e-14	-1.46755
206262_at	ADH1C	mRNA	0.000431	9.91e-05	-1.4645
208383_s_at	PCK1	mRNA	0.000684	0.000169	-1.46276
229229_at	AGXT2	mRNA	3.42e-08	1.91e-09	-1.45771
219564_at	KCNJ16	mRNA	1.34e-08	6.52e-10	-1.45423
206119_at	BHMT	mRNA	4.37e-05	7.06e-06	-1.45351
225557_at	CSRNP1	mRNA	4.76e-18	6.35e-21	-1.44846
210521_s_at	FETUB	mRNA	0.000662	0.000163	-1.44068
218285_s_at	BDH2	mRNA	9.68e-15	3.91e-17	-1.43657
209116_x_at	HBB	mRNA	7.24e-08	4.55e-09	-1.43639
224061_at	INMT	mRNA	5.16e-11	9.69e-13	-1.42946
219313_at	GRAMD1C	mRNA	6.4e-07	5.54e-08	-1.42707
207097_s_at	SLC17A2	mRNA	2.42e-06	2.56e-07	-1.4163
226181_at	TUBE1	mRNA	2.11e-11	3.35e-13	-1.41583
210072_at	CCL19	mRNA	6.79e-06	8.44e-07	-1.41315
205478_at	PPP1R1A	mRNA	6.73e-05	1.16e-05	-1.41136
203499_at	EPHA2	mRNA	1.81e-15	5.07e-18	-1.40875
218921_at	SIGIRR	mRNA	3.01e-13	2.29e-15	-1.40395
1554668_a_at	FAM151A	mRNA	9.97e-11	2.1e-12	-1.4032
231018_at	PALM3	mRNA	3.42e-13	2.69e-15	-1.40255
226863_at	FAM110C	mRNA	7.94e-06	1.01e-06	-1.39849
219873_at	COLEC11	mRNA	8.14e-07	7.31e-08	-1.39818
207041_at	MASP2	mRNA	9.87e-08	6.49e-09	-1.39535
207544_s_at	ADH6	mRNA	4.4e-07	3.62e-08	-1.39521
207820_at	ADH1A	mRNA	0.000104	1.91e-05	-1.38988
214719_at	SLC46A3	mRNA	8.84e-07	8.03e-08	-1.3886
206469_x_at	AKR7A3	mRNA	9.46e-11	1.98e-12	-1.38827
202145_at	LY6E	mRNA	7.49e-13	6.7e-15	-1.38574
207131_x_at	GGT1	mRNA	5.82e-11	1.12e-12	-1.38113
1554837_a_at	CYP4A11	mRNA	9.98e-13	9.42e-15	-1.37823
207298_at	SLC17A3	mRNA	6.09e-08	3.72e-09	-1.37799
223605_at	SLC25A18	mRNA	1.58e-06	1.57e-07	-1.3753
205789_at	CD1D	mRNA	3.02e-08	1.67e-09	-1.37522
203638_s_at	FGFR2	mRNA	0.000329	7.28e-05	-1.36421
209368_at	EPHX2	mRNA	3.37e-09	1.29e-10	-1.36107
208131_s_at	PTGIS	mRNA	3.28e-07	2.58e-08	-1.3602
217996_at	PHLDA1	mRNA	2.12e-07	1.57e-08	-1.35824
207200_at	OTC	mRNA	0.000765	0.000192	-1.3523
220604_x_at	FTCD	mRNA	4.25e-09	1.71e-10	-1.35024
235737_at	TSLP	mRNA	7.06e-06	8.83e-07	-1.34744
202627_s_at	SERPINE1	mRNA	4.66e-07	3.86e-08	-1.347
213929_at	EXPH5	mRNA	5.03e-06	5.97e-07	-1.34331
220139_at	DNMT3L	mRNA	1.07e-13	6.57e-16	-1.34309
205019_s_at	VIPR1	mRNA	1.97e-26	1.81e-30	-1.34089
202917_s_at	S100A8	mRNA	6.14e-05	1.05e-05	-1.34048
228844_at	SLC13A5	mRNA	0.000228	4.74e-05	-1.33554
207773_x_at	CYP3A43	mRNA	6.9e-08	4.3e-09	-1.33322
206085_s_at	CTH	mRNA	3.21e-05	4.97e-06	-1.33231
1552670_a_at	PPP1R3B	mRNA	1.7e-10	3.92e-12	-1.33225
1552281_at	SLC39A5	mRNA	1.7e-11	2.54e-13	-1.33201
226846_at	PHYHD1	mRNA	6.5e-09	2.82e-10	-1.32618
201261_x_at	BGN	mRNA	1.28e-06	1.23e-07	-1.32296
204836_at	GLDC	mRNA	7.94e-09	3.57e-10	-1.32126
205392_s_at	CCL14	mRNA	6.33e-11	1.22e-12	-1.31953
205876_at	LIFR	mRNA	2.84e-19	2.75e-22	-1.31868
205892_s_at	FABP1	mRNA	0.00148	0.000414	-1.31672
231070_at	IYD	mRNA	1.52e-07	1.07e-08	-1.31334
228293_at	DEPDC7	mRNA	2.81e-07	2.17e-08	-1.31087
224243_at	APOA5	mRNA	2.85e-09	1.07e-10	-1.31042
210587_at	INHBE	mRNA	0.00011	2.03e-05	-1.30786
213245_at	ADCY1	mRNA	2.26e-05	3.32e-06	-1.30258
206065_s_at	DPYS	mRNA	0.0002	4.09e-05	-1.29516
226267_at	JDP2	mRNA	7.83e-14	4.54e-16	-1.29393
211456_x_at	MT1HL1	mRNA	2.68e-08	1.45e-09	-1.29345
219733_s_at	SLC27A5	mRNA	2.01e-05	2.89e-06	-1.29127
202525_at	PRSS8	mRNA	3.42e-09	1.32e-10	-1.2902
220446_s_at	CHST4	mRNA	2.37e-13	1.72e-15	-1.28713
206010_at	HABP2	mRNA	2.25e-07	1.68e-08	-1.28596
1561336_at	DNASE1L3	mRNA	6.21e-16	1.44e-18	-1.28162
209795_at	CD69	mRNA	5.15e-06	6.14e-07	-1.27898
207420_at	COLEC10	mRNA	2.39e-20	1.79e-23	-1.27829
241986_at	BMPER	mRNA	6.83e-20	5.37e-23	-1.2769
206457_s_at	DIO1	mRNA	0.000806	0.000204	-1.27647
219343_at	CDC37L1	mRNA	7.3e-16	1.74e-18	-1.27509
207735_at	RNF125	mRNA	1.33e-11	1.93e-13	-1.27401
205911_at	PTH1R	mRNA	1.03e-19	8.46e-23	-1.2708
205913_at	PLIN1	mRNA	1.68e-12	1.73e-14	-1.2698
227099_s_at	C11orf96	mRNA	5.54e-06	6.66e-07	-1.26958
202366_at	ACADS	mRNA	5.04e-21	3.22e-24	-1.26053
221188_s_at	CIDEB	mRNA	4.07e-10	1.08e-11	-1.25569
219281_at	MSRA	mRNA	7.94e-15	3.03e-17	-1.25384
212865_s_at	COL14A1	mRNA	0.00013	2.48e-05	-1.25242
215689_s_at	SHBG	mRNA	4.5e-15	1.52e-17	-1.25076
1556167_at	MROH2A	mRNA	6.33e-05	1.08e-05	-1.2475
226096_at	FNDC5	mRNA	0.000122	2.31e-05	-1.24668
210397_at	DEFB1	mRNA	0.00305	0.000953	-1.24648
207574_s_at	GADD45B	mRNA	7.04e-09	3.11e-10	-1.24586
204920_at	CPS1	mRNA	0.00175	0.000501	-1.24249
209301_at	CA2	mRNA	6.67e-09	2.91e-10	-1.24222
202241_at	TRIB1	mRNA	2.36e-15	6.88e-18	-1.24156
238003_at	HEPACAM	mRNA	2.73e-05	4.12e-06	-1.23399
206344_at	PON1	mRNA	1.74e-06	1.75e-07	-1.22809
203562_at	FEZ1	mRNA	5.75e-13	4.93e-15	-1.22438
220224_at	HAO1	mRNA	0.000159	3.13e-05	-1.21835
1553341_at	UROC1	mRNA	1.66e-16	3.12e-19	-1.21804
215129_at	PIK3C2G	mRNA	3.27e-08	1.82e-09	-1.21524
216223_at	CPN2	mRNA	1.88e-06	1.91e-07	-1.21071
209596_at	MXRA5	mRNA	5.97e-06	7.27e-07	-1.2102
1405_i_at	CCL5	mRNA	2.19e-06	2.28e-07	-1.20877
219778_at	ZFPM2	mRNA	2.73e-08	1.48e-09	-1.20679
1565778_at	ABCA8	mRNA	2.8e-07	2.16e-08	-1.20608
203088_at	FBLN5	mRNA	6.95e-08	4.34e-09	-1.20431
212185_x_at	MT2A	mRNA	8.62e-08	5.53e-09	-1.20114
204621_s_at	NR4A2	mRNA	3.18e-06	3.52e-07	-1.20054
1558034_s_at	CP	mRNA	9.51e-06	1.24e-06	-1.19758
212067_s_at	C1R	mRNA	6.1e-08	3.73e-09	-1.19716
220112_at	ANKRD55	mRNA	7.37e-22	3.5e-25	-1.195
1566528_at	CUX2	mRNA	7.57e-06	9.55e-07	-1.19353
209956_s_at	CAMK2B	mRNA	3.89e-13	3.15e-15	-1.18133
203680_at	PRKAR2B	mRNA	5.59e-07	4.77e-08	-1.17959
219087_at	ASPN	mRNA	0.000369	8.27e-05	-1.1794
1552440_at	GPR182	mRNA	1.73e-19	1.52e-22	-1.17789
205044_at	GABRP	mRNA	2.28e-07	1.71e-08	-1.17509
223820_at	RBP5	mRNA	7.16e-07	6.31e-08	-1.17201
205530_at	ETFDH	mRNA	2.73e-09	1.01e-10	-1.1719
209122_at	PLIN2	mRNA	1.46e-09	4.84e-11	-1.17065
206606_at	LIPC	mRNA	1.78e-07	1.28e-08	-1.16999
238063_at	TMEM154	mRNA	1.19e-06	1.13e-07	-1.16724
206070_s_at	EPHA3	mRNA	0.000214	4.42e-05	-1.16704
229084_at	CNTN4	mRNA	7.11e-09	3.15e-10	-1.16646
205768_s_at	SLC27A2	mRNA	0.000222	4.61e-05	-1.16437
210106_at	RDH5	mRNA	4.63e-14	2.42e-16	-1.16351
202861_at	PER1	mRNA	7.2e-14	4.13e-16	-1.1592
206449_s_at	MASP1	mRNA	1.31e-09	4.26e-11	-1.15909
218935_at	EHD3	mRNA	6.76e-13	5.94e-15	-1.15888
202391_at	BASP1	mRNA	7.53e-07	6.68e-08	-1.15875
207977_s_at	DPT	mRNA	7.35e-10	2.16e-11	-1.15862
209645_s_at	ALDH1B1	mRNA	9.83e-12	1.36e-13	-1.15846
202388_at	RGS2	mRNA	0.000158	3.1e-05	-1.15824
206484_s_at	XPNPEP2	mRNA	0.000556	0.000133	-1.15229
204818_at	HSD17B2	mRNA	6.23e-05	1.06e-05	-1.15057
204472_at	GEM	mRNA	8.36e-05	1.49e-05	-1.14995
229241_at	LDHD	mRNA	1.02e-09	3.18e-11	-1.14775
226807_at	ZFP1	mRNA	4.9e-10	1.33e-11	-1.14461
205627_at	CDA	mRNA	2.25e-06	2.35e-07	-1.14036
226745_at	CYP4V2	mRNA	1.12e-08	5.31e-10	-1.13743
220393_at	LGSN	mRNA	0.00162	0.000459	-1.13676
226649_at	PANK1	mRNA	6.8e-09	2.98e-10	-1.13226
220110_s_at	NXF3	mRNA	2.46e-21	1.44e-24	-1.13069
214889_at	FAM149A	mRNA	2.51e-08	1.34e-09	-1.13059
235904_at	UGT3A1	mRNA	0.000755	0.00019	-1.12963
207526_s_at	IL1RL1	mRNA	1.1e-10	2.36e-12	-1.12905
206979_at	C8B	mRNA	1.96e-05	2.82e-06	-1.12798
229819_at	A1BG	mRNA	0.000258	5.48e-05	-1.12712
205227_at	IL1RAP	mRNA	3.9e-08	2.23e-09	-1.12579
205355_at	ACADSB	mRNA	3.82e-06	4.34e-07	-1.12506
222071_s_at	SLCO4C1	mRNA	8.84e-05	1.59e-05	-1.12065
206386_at	SERPINA7	mRNA	0.00192	0.000556	-1.12058
231790_at	DMGDH	mRNA	0.000257	5.46e-05	-1.11928
205141_at	ANG	mRNA	9.9e-06	1.3e-06	-1.11715
229230_at	SLC51A	mRNA	0.00193	0.000561	-1.1124
214382_at	UNC93A	mRNA	0.000382	8.62e-05	-1.11201
206629_at	ADAMTSL2	mRNA	1.54e-10	3.48e-12	-1.11158
224839_s_at	GPT2	mRNA	1.71e-06	1.72e-07	-1.11002
1555250_a_at	CPEB3	mRNA	7.6e-12	1.02e-13	-1.10664
206410_at	NR0B2	mRNA	8.31e-09	3.77e-10	-1.10321
207378_at	TREH	mRNA	1.63e-08	8.14e-10	-1.1008
238029_s_at	SLC16A14	mRNA	2.69e-05	4.04e-06	-1.10059
208891_at	DUSP6	mRNA	8.78e-10	2.65e-11	-1.10044
209612_s_at	ADH1B	mRNA	0.00433	0.00144	-1.1002
206878_at	DAO	mRNA	1.81e-06	1.83e-07	-1.09734
228770_at	GPR146	mRNA	2.61e-16	5.39e-19	-1.09713
206287_s_at	ITIH4	mRNA	9.13e-05	1.65e-05	-1.0961
213661_at	PAMR1	mRNA	1.08e-18	1.3e-21	-1.0955
228384_s_at	PYROXD2	mRNA	3.77e-07	3.05e-08	-1.09445
210013_at	HPX	mRNA	0.000186	3.76e-05	-1.09398
211682_x_at	UGT2B11	mRNA	8.33e-06	1.07e-06	-1.09358
225573_at	ACAD11	mRNA	9.67e-11	2.03e-12	-1.09282
203509_at	SORL1	mRNA	3.01e-07	2.34e-08	-1.09097
201963_at	ACSL1	mRNA	6.24e-07	5.38e-08	-1.09056
209821_at	IL33	mRNA	7.49e-07	6.64e-08	-1.0867
225283_at	ARRDC4	mRNA	8.13e-06	1.04e-06	-1.08612
207560_at	SLC28A1	mRNA	1.72e-13	1.14e-15	-1.08303
219666_at	MS4A6A	mRNA	3.62e-10	9.37e-12	-1.08226
213056_at	FRMD4B	mRNA	2.97e-13	2.24e-15	-1.08087
214146_s_at	PPBP	mRNA	1.44e-08	7.04e-10	-1.07928
223623_at	C2orf40	mRNA	3.23e-09	1.23e-10	-1.07827
230677_at	EXOC3L4	mRNA	1.25e-07	8.51e-09	-1.07354
226597_at	REEP6	mRNA	6.25e-05	1.07e-05	-1.07271
220161_s_at	EPB41L4B	mRNA	3.11e-08	1.72e-09	-1.06631
217858_s_at	ARMCX3	mRNA	5.84e-05	9.86e-06	-1.06551
203924_at	GSTA1	mRNA	0.00472	0.00159	-1.06474
229473_at	MAMDC4	mRNA	5.07e-10	1.39e-11	-1.06365
209606_at	CYTIP	mRNA	3.85e-05	6.13e-06	-1.06347
213279_at	DHRS1	mRNA	5.43e-08	3.26e-09	-1.06217
206292_s_at	SULT2A1	mRNA	0.00404	0.00133	-1.0592
205404_at	HSD11B1	mRNA	0.0117	0.0046	-1.05903
210619_s_at	HYAL1	mRNA	8.43e-06	1.08e-06	-1.0589
206867_at	GCKR	mRNA	1.42e-08	6.95e-10	-1.0584
209840_s_at	LRRN3	mRNA	1.57e-14	6.9e-17	-1.05756
202081_at	IER2	mRNA	1.54e-11	2.28e-13	-1.05618
205923_at	RELN	mRNA	0.00477	0.00162	-1.05525
232235_at	DSEL	mRNA	0.000133	2.55e-05	-1.05521
225616_at	SPRYD4	mRNA	1.41e-12	1.4e-14	-1.05445
235377_at	MLIP	mRNA	0.000135	2.59e-05	-1.05194
1558603_at	PLG	mRNA	1.6e-06	1.59e-07	-1.04918
222705_s_at	SLC25A15	mRNA	1.83e-06	1.85e-07	-1.04658
243110_x_at	NPW	mRNA	0.00875	0.00327	-1.04481
205075_at	SERPINF2	mRNA	1.41e-07	9.79e-09	-1.04323
1555345_at	SLC38A4	mRNA	0.000216	4.47e-05	-1.04252
203500_at	GCDH	mRNA	3.11e-10	7.83e-12	-1.04239
205790_at	SKAP1	mRNA	4.33e-08	2.52e-09	-1.04008
206115_at	EGR3	mRNA	2.3e-05	3.38e-06	-1.03509
219948_x_at	UGT2A3	mRNA	0.000381	8.6e-05	-1.03478
202847_at	PCK2	mRNA	7.54e-06	9.5e-07	-1.03471
218901_at	PLSCR4	mRNA	1.18e-09	3.76e-11	-1.0338
209242_at	PEG3	mRNA	0.0128	0.00509	-1.03114
206177_s_at	ARG1	mRNA	0.00647	0.0023	-1.03063
206514_s_at	CYP4F2	mRNA	7.11e-05	1.23e-05	-1.02762
201650_at	KRT15	mRNA	0.00868	0.00324	-1.02733
205675_at	MTTP	mRNA	0.000735	0.000183	-1.02391
204271_s_at	EDNRB	mRNA	9.88e-10	3.06e-11	-1.02388
201531_at	ZFP36	mRNA	3.33e-11	5.76e-13	-1.02296
219274_at	TSPAN12	mRNA	2.16e-06	2.24e-07	-1.02265
206702_at	TEK	mRNA	3.45e-09	1.33e-10	-1.02155
213122_at	TSPYL5	mRNA	9.42e-10	2.89e-11	-1.0213
1555539_at	SDS	mRNA	0.00642	0.00228	-1.02088
233403_x_at	TM6SF2	mRNA	1.39e-11	2.02e-13	-1.0207
206350_at	APCS	mRNA	0.00316	0.000995	-1.01797
223278_at	GJB2	mRNA	1.13e-05	1.51e-06	-1.0166
230602_at	ACMSD	mRNA	0.000445	0.000103	-1.01639
206450_at	DBH	mRNA	1.87e-19	1.67e-22	-1.01584
205649_s_at	FGA	mRNA	0.000629	0.000153	-1.01582
209443_at	SERPINA5	mRNA	0.000102	1.86e-05	-1.01446
218983_at	C1RL	mRNA	1.57e-09	5.31e-11	-1.01215
238440_at	CLYBL	mRNA	2.87e-07	2.22e-08	-1.01139
219584_at	PLA1A	mRNA	5.42e-05	9.07e-06	-1.01107
1570505_at	ABCB4	mRNA	0.00167	0.000473	-1.01029
225502_at	DOCK8	mRNA	1.91e-05	2.74e-06	-1.00967
232158_x_at	NIPAL1	mRNA	9.49e-09	4.36e-10	-1.00871
203725_at	GADD45A	mRNA	1.26e-07	8.62e-09	-1.00792
220005_at	P2RY13	mRNA	1.6e-08	7.98e-10	-1.00397
216696_s_at	PRODH2	mRNA	1.72e-07	1.23e-08	-1.00292
222016_s_at	ZSCAN31	mRNA	2.75e-05	4.15e-06	1.00352
226962_at	ZBTB41	mRNA	8e-11	1.62e-12	1.00426
209035_at	MDK	mRNA	2.24e-06	2.34e-07	1.00473
225105_at	C12orf75	mRNA	0.000312	6.84e-05	1.00897
204767_s_at	FEN1	mRNA	1.54e-10	3.48e-12	1.01744
205896_at	SLC22A4	mRNA	1.41e-06	1.37e-07	1.01759
231131_at	FAM133A	mRNA	7.03e-05	1.22e-05	1.01879
206143_at	SLC26A3	mRNA	0.00245	0.000739	1.01932
201897_s_at	CKS1B	mRNA	6.9e-12	9.07e-14	1.0206
1555241_at	C8orf59	mRNA	3.33e-10	8.52e-12	1.02122
215432_at	ACSM1	mRNA	0.000535	0.000127	1.02688
224632_at	GPATCH4	mRNA	1.14e-12	1.11e-14	1.02769
208694_at	PRKDC	mRNA	2.71e-10	6.68e-12	1.02981
206286_s_at	TDGF1	mRNA	0.000772	0.000194	1.03445
202411_at	IFI27	mRNA	0.00613	0.00216	1.037
213125_at	OLFML2B	mRNA	2.43e-09	8.79e-11	1.03736
200910_at	CCT3	mRNA	1.52e-14	6.66e-17	1.03803
205046_at	CENPE	mRNA	2.34e-09	8.42e-11	1.04432
221523_s_at	RRAGD	mRNA	1.1e-07	7.35e-09	1.04627
1556064_at	PPARA	mRNA	8.47e-14	5.02e-16	1.04714
220295_x_at	DEPDC1	mRNA	2.21e-07	1.65e-08	1.04934
212092_at	PEG10	mRNA	0.00056	0.000134	1.04996
203714_s_at	TBCE	mRNA	1.65e-14	7.59e-17	1.05144
215470_at	GTF2H2C	mRNA	2.17e-11	3.49e-13	1.05526
210052_s_at	TPX2	mRNA	1.3e-07	8.92e-09	1.05539
223156_at	MRPS23	mRNA	8.09e-14	4.75e-16	1.05556
208148_at	MYH4	mRNA	5.51e-05	9.24e-06	1.0572
222825_at	OTUD6B	mRNA	6.12e-10	1.74e-11	1.05726
213599_at	OIP5	mRNA	4.32e-09	1.75e-10	1.05733
204709_s_at	KIF23	mRNA	2.23e-07	1.66e-08	1.05794
225252_at	SRXN1	mRNA	1.9e-07	1.39e-08	1.0586
219493_at	SHCBP1	mRNA	1.11e-07	7.41e-09	1.06256
200652_at	SSR2	mRNA	1.22e-15	3.14e-18	1.06287
203987_at	FZD6	mRNA	0.000195	3.97e-05	1.06477
223274_at	TCF19	mRNA	3.3e-11	5.7e-13	1.06503
210652_s_at	TTC39A	mRNA	1.21e-05	1.64e-06	1.06533
235496_at	HRCT1	mRNA	1.4e-06	1.37e-07	1.06598
201940_at	CPD	mRNA	6.6e-12	8.57e-14	1.07028
206613_s_at	TAF1A	mRNA	3.77e-13	3.03e-15	1.07105
201555_at	MCM3	mRNA	3.42e-13	2.69e-15	1.07405
201485_s_at	RCN2	mRNA	6.99e-13	6.2e-15	1.07497
209408_at	KIF2C	mRNA	1.12e-08	5.3e-10	1.07724
1565951_s_at	CHML	mRNA	1.98e-07	1.46e-08	1.07849
1553197_at	DCAF4L2	mRNA	0.00404	0.00132	1.07859
201841_s_at	HSPB1	mRNA	1.88e-10	4.41e-12	1.08534
208808_s_at	HMGB2	mRNA	3.24e-10	8.24e-12	1.08697
229614_at	ZNF320	mRNA	0.000511	0.000121	1.08826
1555225_at	C1orf43	mRNA	9.02e-14	5.44e-16	1.09163
1553099_at	TIGD1	mRNA	2.23e-10	5.35e-12	1.09264
213172_at	TTC9	mRNA	1.9e-07	1.39e-08	1.09479
211122_s_at	CXCL11	mRNA	0.000702	0.000174	1.09552
209406_at	BAG2	mRNA	1.44e-07	1e-08	1.0978
209160_at	AKR1C3	mRNA	1.75e-08	8.81e-10	1.10164
204776_at	THBS4	mRNA	4.25e-06	4.91e-07	1.10714
205053_at	PRIM1	mRNA	2.36e-11	3.86e-13	1.11036
227711_at	GTSF1	mRNA	0.000998	0.000262	1.11347
1554679_a_at	LAPTM4B	mRNA	0.00012	2.25e-05	1.11609
202580_x_at	FOXM1	mRNA	1.23e-09	3.96e-11	1.12036
1557227_s_at	TPR	mRNA	6.12e-12	7.79e-14	1.12261
218728_s_at	CNIH4	mRNA	9.63e-13	8.99e-15	1.12505
205339_at	STIL	mRNA	2.33e-12	2.56e-14	1.12687
205373_at	CTNNA2	mRNA	0.000234	4.89e-05	1.12719
226059_at	TOMM40L	mRNA	1.12e-10	2.41e-12	1.12769
214830_at	SLC38A6	mRNA	4.29e-10	1.14e-11	1.13161
201681_s_at	DLG5	mRNA	2.13e-09	7.56e-11	1.13379
201266_at	TXNRD1	mRNA	1.76e-08	8.85e-10	1.134
204580_at	MMP12	mRNA	0.00427	0.00141	1.1345
238066_at	RBP7	mRNA	9.63e-10	2.97e-11	1.13575
214774_x_at	TOX3	mRNA	0.00015	2.93e-05	1.14185
218782_s_at	ATAD2	mRNA	4.22e-08	2.45e-09	1.14814
201930_at	MCM6	mRNA	9.21e-12	1.26e-13	1.14972
211964_at	COL4A2	mRNA	3.38e-09	1.3e-10	1.15148
232707_at	ISX	mRNA	1.45e-05	2e-06	1.15173
200795_at	SPARCL1	mRNA	1.75e-05	2.47e-06	1.15686
204105_s_at	NRCAM	mRNA	0.00088	0.000226	1.15813
1555236_a_at	PGC	mRNA	0.000544	0.00013	1.15912
203967_at	CDC6	mRNA	2.28e-09	8.19e-11	1.16104
201590_x_at	ANXA2	mRNA	3.14e-10	7.92e-12	1.16298
202963_at	RFX5	mRNA	4.49e-15	1.5e-17	1.16582
208699_x_at	TKT	mRNA	2.41e-08	1.28e-09	1.16585
228069_at	MTFR2	mRNA	3.8e-10	9.91e-12	1.16752
209990_s_at	GABBR2	mRNA	0.000206	4.22e-05	1.16789
213007_at	FANCI	mRNA	1.44e-09	4.75e-11	1.16814
204092_s_at	AURKA	mRNA	2.09e-09	7.4e-11	1.17177
204033_at	TRIP13	mRNA	4.84e-12	5.97e-14	1.17257
1552619_a_at	ANLN	mRNA	6.24e-09	2.69e-10	1.17412
202786_at	STK39	mRNA	2.22e-05	3.25e-06	1.18036
204510_at	CDC7	mRNA	4.42e-10	1.18e-11	1.18447
205862_at	GREB1	mRNA	6.18e-05	1.05e-05	1.18508
220840_s_at	C1orf112	mRNA	3.27e-12	3.8e-14	1.19232
204023_at	RFC4	mRNA	2.2e-13	1.55e-15	1.19328
200052_s_at	ILF2	mRNA	8e-15	3.1e-17	1.19643
229656_s_at	EML6	mRNA	9.22e-10	2.81e-11	1.20599
218542_at	CEP55	mRNA	3.18e-08	1.76e-09	1.20677
205352_at	SERPINI1	mRNA	6.38e-09	2.76e-10	1.20789
201088_at	KPNA2	mRNA	5.3e-14	2.91e-16	1.2139
208850_s_at	THY1	mRNA	4.06e-11	7.29e-13	1.21999
223700_at	MND1	mRNA	4.86e-11	9.04e-13	1.23187
209891_at	SPC25	mRNA	2.38e-08	1.26e-09	1.23538
207039_at	CDKN2A	mRNA	7.91e-08	5.02e-09	1.23643
222039_at	KIF18B	mRNA	2.85e-09	1.06e-10	1.24326
201467_s_at	NQO1	mRNA	0.00018	3.62e-05	1.26278
219772_s_at	SMPX	mRNA	3.84e-05	6.11e-06	1.27237
202954_at	UBE2C	mRNA	4.09e-10	1.08e-11	1.27271
205097_at	SLC26A2	mRNA	1.78e-12	1.85e-14	1.28133
205830_at	CLGN	mRNA	0.000265	5.66e-05	1.29848
202779_s_at	UBE2S	mRNA	2.11e-11	3.33e-13	1.30172
231310_at	TRIM71	mRNA	8.6e-05	1.54e-05	1.30661
227646_at	EBF1	mRNA	6.76e-11	1.33e-12	1.30907
210609_s_at	TP53I3	mRNA	3.75e-11	6.64e-13	1.31574
228033_at	E2F7	mRNA	4.97e-09	2.06e-10	1.31803
204537_s_at	GABRE	mRNA	1.3e-07	8.94e-09	1.31898
1553589_a_at	PDZK1IP1	mRNA	0.000328	7.24e-05	1.32163
224320_s_at	MCM8	mRNA	7.98e-14	4.66e-16	1.32186
1557910_at	HSP90AB1	mRNA	9.04e-14	5.47e-16	1.32863
218350_s_at	GMNN	mRNA	4.1e-11	7.38e-13	1.33412
221529_s_at	PLVAP	mRNA	1.55e-22	5.69e-26	1.33615
218788_s_at	SMYD3	mRNA	2.23e-09	7.97e-11	1.33657
205110_s_at	FGF13	mRNA	2.08e-05	3.02e-06	1.34097
205623_at	ALDH3A1	mRNA	0.00173	0.000493	1.34715
202345_s_at	FABP5	mRNA	2.73e-08	1.48e-09	1.34766
204444_at	KIF11	mRNA	7.21e-10	2.12e-11	1.35728
1563591_at	RUNX1	mRNA	0.000494	0.000116	1.35878
207156_at	HIST1H2AG	mRNA	4.87e-08	2.88e-09	1.35994
201578_at	PODXL	mRNA	1.83e-14	8.55e-17	1.36069
220085_at	HELLS	mRNA	5.91e-09	2.53e-10	1.36375
220994_s_at	STXBP6	mRNA	2.11e-11	3.34e-13	1.36471
206698_at	XK	mRNA	6.97e-05	1.21e-05	1.36686
205909_at	POLE2	mRNA	1.26e-09	4.1e-11	1.37935
204159_at	CDKN2C	mRNA	3.13e-13	2.41e-15	1.38783
201656_at	ITGA6	mRNA	2.4e-16	4.79e-19	1.39437
207325_x_at	MAGEA1	mRNA	8.53e-05	1.52e-05	1.4025
205564_at	PAGE4	mRNA	0.000297	6.46e-05	1.40414
205034_at	CCNE2	mRNA	7.91e-10	2.35e-11	1.41551
226980_at	DEPDC1B	mRNA	1.44e-09	4.73e-11	1.41903
226545_at	CD109	mRNA	2.93e-07	2.27e-08	1.43432
209421_at	MSH2	mRNA	3.93e-17	6.4e-20	1.43788
219703_at	MNS1	mRNA	2.41e-08	1.28e-09	1.46624
222906_at	FLVCR1	mRNA	7.5e-14	4.34e-16	1.47126
204825_at	MELK	mRNA	1.03e-13	6.27e-16	1.47937
203764_at	DLGAP5	mRNA	1.89e-10	4.42e-12	1.52214
204962_s_at	CENPA	mRNA	4.16e-11	7.52e-13	1.54167
219990_at	E2F8	mRNA	4.01e-11	7.17e-13	1.5501
203554_x_at	PTTG1	mRNA	2.49e-14	1.21e-16	1.55223
210467_x_at	MAGEA12	mRNA	5.89e-05	9.94e-06	1.55602
211980_at	COL4A1	mRNA	6.56e-14	3.72e-16	1.56052
222848_at	CENPK	mRNA	3.66e-12	4.3e-14	1.59206
232195_at	GPR158	mRNA	3.84e-12	4.59e-14	1.5938
202870_s_at	CDC20	mRNA	4.85e-11	9.02e-13	1.60166
209642_at	BUB1	mRNA	3.81e-11	6.78e-13	1.60505
204351_at	S100P	mRNA	0.000761	0.000191	1.6089
206632_s_at	APOBEC3A	mRNA	1.71e-08	8.59e-10	1.6092
204146_at	RAD51AP1	mRNA	1.43e-13	9.23e-16	1.62154
203358_s_at	EZH2	mRNA	2.46e-16	4.96e-19	1.63887
226936_at	CENPW	mRNA	3.62e-16	7.84e-19	1.65478
204822_at	TTK	mRNA	1.93e-11	2.97e-13	1.66356
204602_at	DKK1	mRNA	0.00142	0.000394	1.67174
223229_at	UBE2T	mRNA	2.01e-14	9.58e-17	1.67358
205890_s_at	UBD	mRNA	2.72e-06	2.92e-07	1.6793
231786_at	HOXA13	mRNA	1.3e-07	8.96e-09	1.69256
208394_x_at	ESM1	mRNA	7.9e-14	4.6e-16	1.69573
218355_at	KIF4A	mRNA	1.03e-12	9.81e-15	1.70735
204026_s_at	ZWINT	mRNA	1.16e-12	1.13e-14	1.71068
209218_at	SQLE	mRNA	1.9e-09	6.62e-11	1.75229
231265_at	COX7B2	mRNA	2.75e-05	4.15e-06	1.76266
205342_s_at	SULT1C2	mRNA	3.11e-06	3.43e-07	1.76792
202705_at	CCNB2	mRNA	1.23e-13	7.7e-16	1.76877
204162_at	NDC80	mRNA	5.48e-15	1.94e-17	1.7879
218883_s_at	CENPU	mRNA	2.03e-13	1.4e-15	1.80414
208650_s_at	CD24	mRNA	7.47e-06	9.41e-07	1.81302
1555745_a_at	LYZ	mRNA	3.04e-05	4.65e-06	1.8239
218662_s_at	NCAPG	mRNA	4.11e-13	3.36e-15	1.82566
212531_at	LCN2	mRNA	1.44e-05	1.99e-06	1.84245
225655_at	UHRF1	mRNA	1.29e-13	8.13e-16	1.84663
204720_s_at	DNAJC6	mRNA	4.47e-13	3.69e-15	1.86527
225834_at	FAM72A	mRNA	1.04e-14	4.23e-17	1.86848
218755_at	KIF20A	mRNA	3.14e-13	2.42e-15	1.88382
206626_x_at	SSX1	mRNA	1.21e-06	1.15e-07	1.89449
218039_at	NUSAP1	mRNA	3.83e-17	6.17e-20	1.89466
223381_at	NUF2	mRNA	2.01e-11	3.13e-13	1.9112
206102_at	GINS1	mRNA	6.96e-14	3.98e-16	1.92533
225687_at	FAM83D	mRNA	2.34e-13	1.67e-15	1.92558
205476_at	CCL20	mRNA	8.03e-06	1.02e-06	1.95085
205815_at	REG3A	mRNA	0.00075	0.000188	1.96706
222077_s_at	RACGAP1	mRNA	2.22e-19	2.03e-22	2.0024
213194_at	ROBO1	mRNA	6.63e-13	5.79e-15	2.02494
203213_at	CDK1	mRNA	4.71e-14	2.47e-16	2.02949
219787_s_at	ECT2	mRNA	2.04e-16	3.95e-19	2.039
223642_at	ZIC2	mRNA	2.92e-09	1.09e-10	2.04572
203755_at	BUB1B	mRNA	7.27e-15	2.69e-17	2.0495
214710_s_at	CCNB1	mRNA	1.58e-14	7.03e-17	2.05386
218009_s_at	PRC1	mRNA	2.12e-16	4.14e-19	2.08587
209875_s_at	SPP1	mRNA	4.63e-06	5.43e-07	2.10148
235004_at	RBM24	mRNA	2.38e-10	5.74e-12	2.1119
209942_x_at	MAGEA3	mRNA	6.38e-05	1.09e-05	2.12012
218585_s_at	DTL	mRNA	3.23e-15	1.02e-17	2.19733
219148_at	PBK	mRNA	8.38e-14	4.95e-16	2.21781
207165_at	HMMR	mRNA	8.58e-18	1.22e-20	2.22024
1555758_a_at	CDKN3	mRNA	1.19e-16	2.13e-19	2.23694
204641_at	NEK2	mRNA	2.47e-15	7.33e-18	2.31466
225681_at	CTHRC1	mRNA	4.08e-08	2.35e-09	2.3372
212551_at	CAP2	mRNA	3.31e-21	2e-24	2.35199
201890_at	RRM2	mRNA	4.35e-18	5.65e-21	2.75129
202422_s_at	ACSL4	mRNA	1.83e-11	2.79e-13	2.81382
219918_s_at	ASPM	mRNA	3.95e-19	3.9e-22	2.85964
203477_at	COL15A1	mRNA	1.87e-18	2.32e-21	2.96806
206561_s_at	AKR1B10	mRNA	7.86e-08	4.98e-09	3.06801
201291_s_at	TOP2A	mRNA	1.2e-20	8.55e-24	3.26196
206239_s_at	SPINK1	mRNA	1.34e-08	6.49e-10	3.65628
209220_at	GPC3	mRNA	2.51e-13	1.84e-15	3.84784
FDR, false discovery rate; FC, fold change; lncRNA, long non-coding RNA.
